# Supplementary material
Source: PubMed Central journal article supplement (PMC2830285)

## Supporting Information

### Synthesis of $\gamma,\delta$ -Unsaturated Glycolic Acids via Sequenced Brook and Ireland-Claisen Rearrangements

Daniel C. Schmitt and Jeffrey S. Johnson\*

*Department of Chemistry, University of North Carolina, Chapel Hill, North Carolina 27599-3290*

email: jsj@unc.edu

#### Table of Contents

|                                                          |         |
|----------------------------------------------------------|---------|
| I. General                                               | S1-S2   |
| II. Synthesis of Silyl Glyoxylates                       | S2-S4   |
| III. Synthesis of Glycolic Acid Derivatives              | S4-S12  |
| IV. Cyclizations of Glycolic Acid Derivatives            | S13-S15 |
| V. Literature Cited                                      | S15     |
| VI. $^1\text{H}$ and $^{13}\text{C}$ Spectra of Products | S16-S36 |
| VII. 2D NOESY for <b>24-27</b>                           | S37-S39 |

**I. Materials and Methods: General.** Infrared (IR) spectra were obtained using a Nicolet 560-E.S.P. infrared spectrometer. Proton and carbon nuclear magnetic resonance spectra ( $^1\text{H}$  and  $^{13}\text{C}$  NMR) were recorded on either a Bruker model Avance 500 ( $^1\text{H}$  at 500 MHz and  $^{13}\text{C}$  NMR at 125 MHz), Bruker model Avance 400 ( $^1\text{H}$  NMR at 400 MHz and  $^{13}\text{C}$  NMR at 100 MHz), or a Varian Gemini 300 ( $^1\text{H}$  NMR at 300 MHz and  $^{13}\text{C}$  at 75 MHz) spectrometer with solvent resonance as the internal standard ( $^1\text{H}$  NMR:  $\text{CDCl}_3$  at 7.26 ppm;  $\text{C}_6\text{D}_6$  at 7.15 ppm and  $^{13}\text{C}$  NMR:  $\text{CDCl}_3$  at 77.0 ppm and  $\text{C}_6\text{D}_6$  at 128.62 ppm).  $^1\text{H}$  NMR data are reported as follows: chemical shift, multiplicity (s = singlet, br s = broad singlet, d = doublet, t = triplet, q = quartet, sept = septet, m = multiplet), coupling constants (Hz), and integration. Analytical thin layer chromatography (TLC) was performed on Whatman 0.25 mm silica gel 60 plates. Visualization was accomplished with UV light and aqueous ceric ammonium molybdate solution followed by heating. Purification of the reaction products was carried out by flash chromatography using Sorbent Technologies silica gel 60 (32-63  $\mu\text{m}$ ). All reactions were carried out under an atmosphere of nitrogen in oven-dried glassware with magnetic stirring. Yield refers to isolated yield of analytically pure material. Yields are reported for a specific experiment and as a result may differ slightly from those found in the tables, which are averages of at least two experiments. Diethyl ether, tetrahydrofuran, and toluene were dried by passage through a column of neutral alumina under nitrogen prior to use.<sup>1</sup> Unless otherwise noted, reagents were obtained from commercial sources and used without further

purification. Triethylamine and diisopropylamine were freshly distilled from CaH<sub>2</sub> under Ar prior to use.

## II. Synthesis of Silyl Glyoxylates

**General esterification procedure A for formation of allylic silyl glyoxylates:** To *t*-butyl *t*-butyldimethylsilyl glyoxylate,<sup>2</sup> (1.0 equiv) a solution of 20:10:1 CH<sub>2</sub>Cl<sub>2</sub>:TFA:H<sub>2</sub>O (0.5 M) was added. After the yellow solution was stirred at room temperature for 1 h, the reaction mixture was concentrated *in vacuo*. The yellow oil was then dissolved in toluene and again concentrated *in vacuo*. The resulting yellow oil was added to a dry round bottom flask and the allylic bromide (1.3 equiv), and tetrabutylammonium iodide (0.1 equiv) were added. The mixture was dissolved in 1:1 Et<sub>2</sub>O:CH<sub>2</sub>Cl<sub>2</sub> (0.1 M) and NEt<sub>3</sub> (1.4 equiv) was added. The flask was fitted with a reflux condenser and the solution was heated to reflux for 10-16 h. The reaction was then allowed to cool to room temperature. The reaction was diluted with 30 mL saturated aqueous NH<sub>4</sub>Cl solution. The layers were separated and the aqueous layer was extracted with Et<sub>2</sub>O (2 X 30 mL) and then CH<sub>2</sub>Cl<sub>2</sub> (2 X 30 mL). The organic extracts were combined, dried with MgSO<sub>4</sub>, and concentrated *in vacuo*. The resulting yellow oil was purified as indicated.

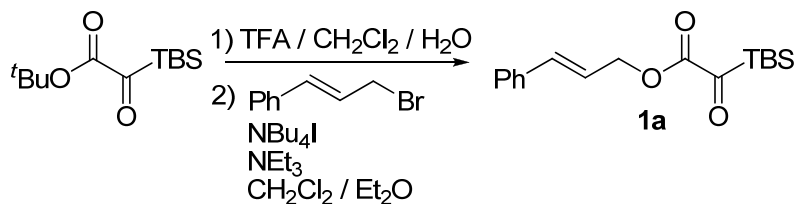

**Cinnamyl *tert*-butyldimethylsilyl glyoxylate (1a).** The general esterification procedure was performed using *t*-butyl *t*-butyldimethylsilyl glyoxylate (4.96 g, 20.3 mmol), cinnamyl bromide (5.20 g, 26.4 mmol), tetrabutylammonium iodide (750 mg, 2.03 mmol), and NEt<sub>3</sub> (3.95 mL, 28.4 mmol). Purification by flash chromatography (3:97 Et<sub>2</sub>O:petroleum ether) furnished 3.07 g (50%) of **1a** as a yellow liquid: **IR** (thin film, cm<sup>-1</sup>) 3029, 2930, 2860, 1718, 1654, 1558, 1541, 1254, 968; **<sup>1</sup>H NMR** (300 MHz, CDCl<sub>3</sub>) δ 7.41-7.28 (m, 5H), 6.73 (d, *J* = 15.6 Hz, 1H), 6.33 (dt, *J* = 15.9, 6.6 Hz, 1H), 4.89 (d, *J* = 6.6 Hz, 2H), 0.97 (s, 9H), 0.30 (s, 6H); **<sup>13</sup>C NMR** (100 MHz, CDCl<sub>3</sub>) δ 231.9, 162.8, 135.9, 135.7, 128.6, 128.3, 126.7, 121.8, 66.0, 26.4, 17.0, -6.9; **TLC** (5:95 EtOAc: petroleum ether) R<sub>f</sub> 0.40. **LRMS** (ESI) exact mass calculated for C<sub>17</sub>H<sub>24</sub>O<sub>3</sub>SiNa: 327.15. Found: 327.13.

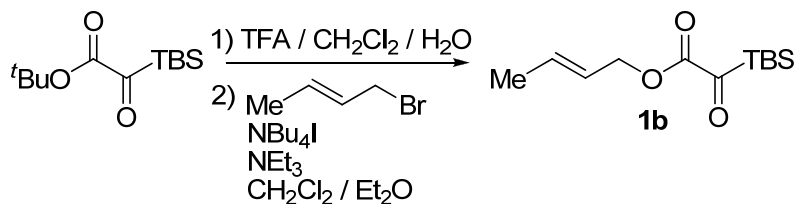

**Crotyl *tert*-butyldimethylsilyl glyoxylate (**1b**)**. The general esterification procedure was performed using *t*-butyl *t*-butyldimethylsilyl glyoxylate (780 mg, 3.19 mmol), *trans*-crotyl bromide<sup>3</sup> (559 mg, 4.14 mmol), tetrabutylammonium iodide (118 mg, 0.319 mmol), and NEt<sub>3</sub> (622  $\mu$ L, 4.47 mmol). Purification by flash chromatography (3:97 Et<sub>2</sub>O:petroleum ether) furnished 335 mg (43%) of **1b** as a yellow liquid: **IR** (thin film, cm<sup>-1</sup>) 2953, 2931, 2886, 2860, 2360, 1719, 1656, 1465, 1254; **<sup>1</sup>H NMR** (400 MHz, CDCl<sub>3</sub>)  $\delta$  5.90-5.84 (m, 1H), 5.67-5.59 (m, 1H), 4.64 (d, *J* = 6.8 Hz, 2H), 1.73 (d, *J* = 6.8 Hz, 3H), 0.96 (s, 9H), 0.27 (s, 6H); **<sup>13</sup>C NMR** (100 MHz, CDCl<sub>3</sub>)  $\delta$  162.8, 133.0, 124.0, 66.1, 27.9, 26.4, 17.7, 16.9, -7.0; **TLC** (5:95 EtOAc: petroleum ether) R<sub>f</sub> 0.52. **LRMS** (ESI) exact mass calculated for C<sub>12</sub>H<sub>22</sub>O<sub>3</sub>SiNa: 265.13. Found: 265.12.

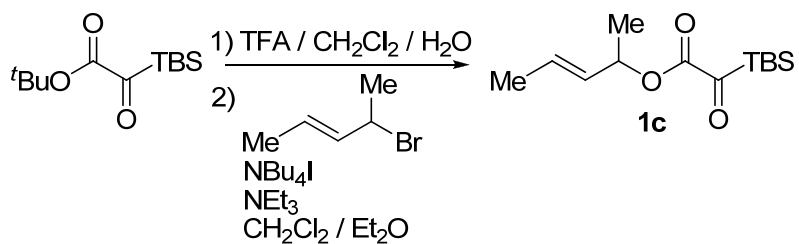

**(*E*)-pent-3-en-2-yl-*tert*-butyldimethylsilyl glyoxylate (**1c**)**. The general esterification procedure was performed using *t*-butyl *t*-butyldimethylsilyl glyoxylate (1.09 g, 4.46 mmol), (*E*)-4-bromopent-2-ene (864 mg, 5.80 mmol), tetrabutylammonium iodide (165 mg, 0.446 mmol), and NEt<sub>3</sub> (870  $\mu$ L, 6.24 mmol). Purification by flash chromatography (3:97 Et<sub>2</sub>O:petroleum ether) furnished 337 mg (29%) of **1c** as a yellow liquid: **IR** (thin film, cm<sup>-1</sup>) 2954, 2932, 2886, 2860, 1715, 1658, 1558, 1541, 1254; **<sup>1</sup>H NMR** (300 MHz, CDCl<sub>3</sub>)  $\delta$  5.85-5.78 (m, 1H), 5.55-5.40 (m, 2H), 1.70 (d, *J* = 6.6, 3H), 1.38 (d, *J* = 6.3 Hz, 3H), 0.95 (s, 9H), 0.27 (s, 6H); **<sup>13</sup>C NMR** (100 MHz, CDCl<sub>3</sub>)  $\delta$  232.1, 162.6, 129.8, 73.2, 26.4, 20.2, 17.5, 16.9, -6.9; **TLC** (5:95 EtOAc: petroleum ether) R<sub>f</sub> 0.54. **LRMS** (ESI) exact mass calculated for C<sub>13</sub>H<sub>24</sub>O<sub>3</sub>SiNa: 279.15. Found: 279.13.

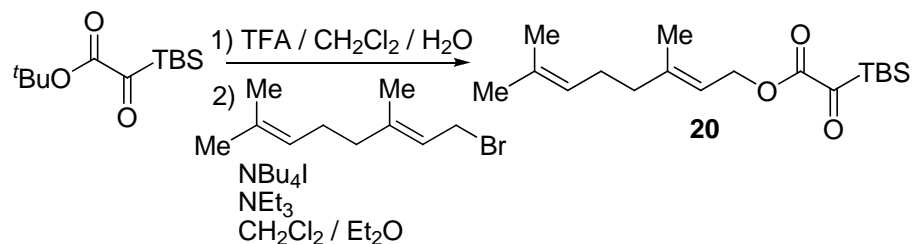

**Geranyl *tert*-butyldimethylsilyl glyoxylate (20).** The general esterification procedure was performed using *t*-butyl *t*-butyldimethylsilyl glyoxylate (1.21 g, 4.94 mmol), geranyl bromide (1.39 g, 6.42 mmol), tetrabutylammonium iodide (182 mg, 0.494 mmol), and NEt<sub>3</sub> (0.96 mL, 6.92 mmol). Purification by flash chromatography (2:98 Et<sub>2</sub>O:petroleum ether) furnished 969 mg (60%) of **20** as a yellow liquid: **IR** (thin film, cm<sup>-1</sup>) 2930, 2859, 1717, 1660, 1464, 1377, 1365, 1252, 990; **<sup>1</sup>H NMR** (300 MHz, CDCl<sub>3</sub>) δ 5.41 (t, *J* = 6.9 Hz, 1H), 5.09-5.07 (m, 1H), 4.75 (d, *J* = 7.5 Hz, 2H), 2.10-2.03 (m, 4H), 1.73 (s, 3H), 1.68 (s, 3H), 1.60 (s, 3H), 0.96 (s, 9H), 0.27 (s, 6H); **<sup>13</sup>C NMR** (100 MHz, CDCl<sub>3</sub>) δ 231.9, 163.1, 143.9, 131.9, 123.6, 117.3, 62.2, 39.5, 28.0, 26.4, 26.3, 25.6, 17.6, 17.0, 16.5, -6.9; **TLC** (5:95 EtOAc: petroleum ether) R<sub>f</sub> 0.53. **LRMS** (ESI) exact mass calculated for C<sub>18</sub>H<sub>32</sub>O<sub>3</sub>SiNa: 347.21. Found: 347.20.

### III. Synthesis of Glycolic Acid Derivatives

**General procedure B for reaction of silyl glyoxylates with MeMgBr:** A solution of MeMgBr (1.7 equiv) in Et<sub>2</sub>O (3 M) was diluted with Et<sub>2</sub>O to 0.18 M. The solution was cooled to 0 °C and a solution of silyl glyoxylate (1.0 equiv) in Et<sub>2</sub>O (0.03 M) was added. The ice bath was removed and the reaction was stirred for 1 min. TMSOTf (2.0 equiv) was added and the reaction was stirred at room temperature for 2-8 h. The reaction was diluted with aqueous HCl (1 M, 5 mL). The layers were separated and the aqueous layer was extracted with CH<sub>2</sub>Cl<sub>2</sub> (3 X 10 mL). The organic extracts were combined, dried with MgSO<sub>4</sub>, and concentrated *in vacuo*. The resulting colorless oil was purified as indicated.

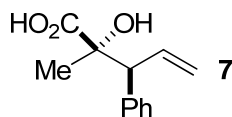

**2-hydroxy-2-methyl-3-phenylpent-4-enoic acid (7).** General procedure B was performed using cinnamyl *tert*-butyldimethylsilyl glyoxylate **1a** (80 mg, 0.263 mmol), MeMgBr (3 M in Et<sub>2</sub>O, 0.15 mL, 0.447 mmol), and TMSOTf (95 μL, 0.526 mmol). The reaction was quenched after 2.5 h. Purification by flash chromatography (96:3:1 petroleum ether:Et<sub>2</sub>O:HOAc) furnished 30 mg (55%) of **7** as a clear oil that matched analytical data previously reported.<sup>4</sup>

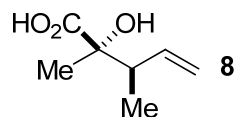

**2-hydroxy-2,3-dimethylpent-4-enoic acid (8).** General procedure B was performed using crotyl *t*-butyldimethylsilyl glyoxylate **1b** (80 mg, 0.33 mmol), MeMgBr (0.19 mL, 0.561 mmol), and TMSOTf (119  $\mu$ L, 0.66 mmol). The reaction was quenched after 3 h. Purification by flash chromatography (96:3:1 petroleum ether:Et<sub>2</sub>O:HOAc) furnished 25 mg (53%) of **8** as a clear oil that matched analytical data previously reported.<sup>5</sup>

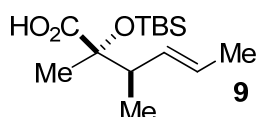

**(E)-2-(tert-butyldimethylsilyloxy)-2,3-dimethylhex-4-enoic acid (9).** General procedure B was performed using (*E*)-pent-3-en-2-yl 2-*tert*-butyldimethylsilyl glyoxylate **1c** (70 mg, 0.273 mmol), MeMgBr (0.155 mL, 0.464 mmol), and TMSOTf (99  $\mu$ L, 0.546 mmol). The reaction was quenched after 7.5 h. Purification by flash chromatography (96:3:1 petroleum ether:Et<sub>2</sub>O:HOAc) furnished 48 mg (65%) of **9** as a white solid. Analytical data for **9**: mp 83 °C; **IR** (thin film, cm<sup>-1</sup>) 2930, 2857, 1715, 1472, 1462, 1410, 1371, 1282, 1198; **<sup>1</sup>H NMR** (400 MHz, CDCl<sub>3</sub>)  $\delta$  5.54-5.45 (m, 1H), 5.34-5.26 (m, 1H), 2.46-2.41 (m, 1H), 1.69 (d, *J* = 6.3 Hz, 3H), 1.44 (s, 3H), 0.99 (d, *J* = 6.6 Hz, 3H), 0.93 (s, 9H), 0.16 (s, 3H), 0.14 (s, 3H); **<sup>13</sup>C NMR** (125 MHz, CDCl<sub>3</sub>)  $\delta$  130.9, 127.7, 80.8, 46.2, 25.8, 24.2, 18.5, 18.0, 15.7, -2.5, -2.7; **TLC** (10:90 EtOAc: petroleum ether) R<sub>f</sub> 0.25. **LRMS** (ESI) exact mass calculated for C<sub>14</sub>H<sub>28</sub>O<sub>3</sub>SiNa: 295.18. Found: 295.17.

**Proof of Stereochemistry:** Product stereochemistry was determined by conversion to the known 2-hydroxy-2,3-dimethylhex-4-enoic acid. This was accomplished via TBAF deprotection. Spectral data of the minor diastereomer were identical to those reported in the literature (Wood, J. L.; Moniz, G. A.; Pflum, D. A.; Stoltz, B. M.; Holubec, A. A.; Dietrich, H. *J. Am. Chem. Soc.* **1999**, *121*, 1748-1749). Major diastereomer: **<sup>1</sup>H NMR** (400 MHz, CDCl<sub>3</sub>)  $\delta$  5.63-5.55 (m, 1H), 5.42-5.36 (m, 1H), 2.52-2.47 (m, 1H), 1.72 (d, *J* = 6.4, 3 H), 1.42 (s, 3H), 1.02 (d, *J* = 6.8 Hz, 3H). Minor diastereomer: (400 MHz, CDCl<sub>3</sub>)  $\delta$  5.63-5.55 (m, 1H), 5.42-5.36 (m, 1H), 2.52-2.47 (m, 1H), 1.67 (d, *J* = 6.4, 3 H), 1.42 (s, 3H), 1.08 (d, *J* = 6.8 Hz, 3H).

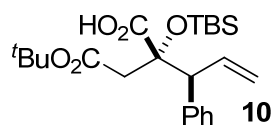

**2-(2-*tert*-butoxy-2-oxoethyl)-2-(*tert*-butyldimethylsilyloxy)-3-phenylpent-4-enoic acid (10).** To 56 mg LiCl in 2.2 mL THF at 0 °C was added diisopropylamine (55  $\mu$ L, 0.395 mmol, 1.5 equiv) followed by <sup>n</sup>BuLi (1.5 M in hexanes, 0.245 mL, 0.368 mmol, 1.4 equiv). The solution was stirred for 10 min at 0 °C and then warmed to room temperature and stirred 15 min. The solution was then cooled to -78 °C and <sup>t</sup>BuOAc (46  $\mu$ L, 0.342 mmol, 1.3 equiv) was added. The solution was stirred for 1 h at -78 °C. Cinnamyl silyl glyoxylate **1a** (80 mg, 0.263 mmol, 1.0 equiv) in 2.0 mL Et<sub>2</sub>O was then added via syringe. The solution was slowly warmed to room temperature and stirred for 19 h. The reaction was diluted with 5 mL aqueous HCl (1 M). The layers were separated and the aqueous layer was extracted with CH<sub>2</sub>Cl<sub>2</sub> (3 X 10 mL). The organic extracts were combined, dried with MgSO<sub>4</sub>, and concentrated *in vacuo*. Purification by flash chromatography (93:6:1 petroleum ether:Et<sub>2</sub>O:HOAc) furnished 34 mg (31%) of **10** as a white solid. Analytical data for **10**: mp 92 °C; **IR** (thin film, cm<sup>-1</sup>) 2929, 2855, 1735, 1558, 1541, 1473, 1393, 1368, 1152; **<sup>1</sup>H NMR** (300 MHz, CDCl<sub>3</sub>)  $\delta$  7.26-7.20 (m, 5H), 6.36-6.24 (m, 1H), 5.27 (dd, *J* = 10.2, 1.2 Hz, 1H), 5.19 (d, *J* = 17.1, 1H), 3.81 (d, *J* = 9.6 Hz, 1H), 2.92 (d, *J* = 16.8 Hz, 1H), 2.72 (d, *J* = 16.8 Hz, 1H), 1.46 (s, 9H), 0.93 (s, 1H), 0.12 (s, 3H), -0.06 (s, 3H); **<sup>13</sup>C NMR** (100 MHz, CDCl<sub>3</sub>)  $\delta$  170.6, 138.9, 135.9, 129.4, 128.0, 127.2, 118.9, 82.5, 80.9, 57.5, 44.7, 28.1, 26.2, 19.0, -2.6, -2.9; **TLC** (10:90 EtOAc: petroleum ether) *R<sub>f</sub>* 0.14. **LRMS** (ESI) exact mass calculated for C<sub>23</sub>H<sub>36</sub>O<sub>5</sub>SiNa: 443.23. Found: 443.21.

**Proof of Stereochemistry:** Product stereochemistry was determined by conversion to the iodolactone **24** and subsequent NOESY analysis. Experimental details are provided below.

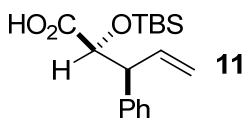

**2-(*tert*-butyldimethylsilyloxy)-3-phenylpent-4-enoic acid (11).** ZnEt<sub>2</sub> (1 M in hexanes, 0.39 mL, 0.394 mmol, 1.5 equiv) was diluted with 1.2 mL Et<sub>2</sub>O. The solution was cooled to 0 °C and a solution of cinnamyl *tert*-butyldimethylsilyl glyoxylate **1a** (80 mg, 0.263 mmol, 1.0 equiv) in 2.8 mL Et<sub>2</sub>O was added. The reaction was warmed to room temperature and allowed to stir for 4 h. The reaction was diluted with 5 mL aqueous HCl (1 M). The layers were separated and the aqueous layer was extracted with CH<sub>2</sub>Cl<sub>2</sub> (3 X 10 mL). The organic extracts were combined, dried with MgSO<sub>4</sub>, and concentrated *in vacuo*. Purification by flash chromatography (96:3:1 petroleum ether:Et<sub>2</sub>O:HOAc) furnished 56 mg (69%) of **11** as a white solid. Analytical data for **11**: mp 82 °C; **IR** (thin film, cm<sup>-1</sup>) 3031, 2954, 2929, 2896, 2858, 2360, 1724, 1255, 1134; **<sup>1</sup>H NMR** (300 MHz, CDCl<sub>3</sub>)  $\delta$  7.32-7.21 (m, 5H), 6.19-6.07 (m, 1H), 5.19 (d, *J* = 3.3 Hz, 1H), 5.14 (s, 1H), 4.44 (d, *J* = 5.7 Hz, 1H), 3.71 (dd, *J* = 8.7, 6.0 Hz, 1H), 0.86 (s, 9H), 0.00 (s, 3H), -0.05 (s, 3H); **<sup>13</sup>C NMR** (100 MHz, CDCl<sub>3</sub>)  $\delta$  176.0,

139.0, 136.9, 128.9, 128.3, 127.1, 117.5, 76.6, 54.6, 25.6, 18.0, -5.4; **TLC** (10:90 EtOAc: petroleum ether)  $R_f$  0.20. **LRMS** (ESI) exact mass calculated for  $C_{17}H_{26}O_3SiNa$ : 329.17. Found: 329.15.

**Proof of Stereochemistry:** Product stereochemistry was determined by conversion to the known 2-hydroxy-3-phenylpent-4-enoic acid. This was accomplished via TBAF deprotection. Spectral data were identical to that reported in the literature (Kaur, P.; Singh, P.; Kumar, S. *Tetrahedron* **2005**, *61*, 8231-8240).  $^1H$  NMR (400 MHz,  $CDCl_3$ )  $\delta$  7.31-7.24 (m, 5H), 6.27-6.18 (m, 1H), 5.27-5.23 (m, 2H), 4.59 (m, 1H), 3.87-3.86 (m, 1H).

**General procedure C for reaction of silyl glyoxylates with allylzinc bromide and methallylzinc bromide:** A solution of allylzinc bromide<sup>6</sup> (1.5 equiv) or methallylzinc bromide<sup>7</sup> (1.5 equiv) in THF (0.33 M) was diluted with  $Et_2O$  to 0.16 M. The solution was cooled to  $-78$  °C and a solution of silyl glyoxylate (1.0 equiv) in  $Et_2O$  (0.10 M) was added. The reaction was allowed to slowly warm to room temperature over 1 h and then stir for 30 min to 3 h at room temperature. The reaction was diluted with 5 mL aqueous HCl (1 M). The layers were separated and the aqueous layer was extracted with  $CH_2Cl_2$  (3 X 10 mL). The organic extracts were combined, dried with  $MgSO_4$ , and concentrated *in vacuo*. The resulting colorless oil was purified as indicated.

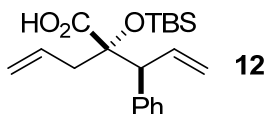

**2-allyl-2-(tert-butyldimethylsilyloxy)-3-phenylpent-4-enoic acid (12).** General procedure C was performed using cinnamyl *tert*-butyldimethylsilyl glyoxylate **1a** (40 mg, 0.131 mmol) and allylZnBr (0.33 M, 0.60 mL, 0.197 mmol). The reaction was quenched after 2 h. Purification by flash chromatography (96:3:1 petroleum ether: $Et_2O$ :HOAc) furnished 31 mg (68%) of **12** as a clear oil. Analytical data for **12** (mix of diastereomers): **IR** (thin film,  $cm^{-1}$ ) 3079, 3031, 2955, 2928, 2895, 1723, 1254, 1158;  $^1H$  NMR (400 MHz,  $CDCl_3$ )  $\delta$  7.33-7.21 (m, 5H), 6.32-6.21 (m, 1H), 5.87-5.74 (m, 1H), 5.25-4.98 (m, 4H), 3.72-3.66 (m, 1H), 2.63-2.24 (m, 3H), 0.96 (s, 9H), 0.11 (s, 3H), -0.10 (s, 3H);  $^{13}C$  NMR (100 MHz,  $CDCl_3$ )  $\delta$  178.5, 139.9, 137.3, 136.1, 132.8, 129.8, 129.4, 128.0, 126.9, 119.1, 118.4, 83.3, 57.3, 44.1, 26.3, 19.2, -1.7, -2.7; **TLC** (10:90 EtOAc:petroleum ether)  $R_f$  0.20. **LRMS** (ESI) exact mass calculated for  $C_{20}H_{30}O_3SiNa$ : 369.20. Found: 369.17.

**Proof of Stereochemistry:** Reaction proceeded with low diastereoselectivity.

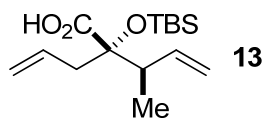

**2-allyl-2-(*tert*-butyldimethylsilyloxy)-3-methylpent-4-enoic acid (13).** General procedure C was performed using crotyl *tert*-butyldimethylsilyl glyoxylate **1b** (80 mg, 0.33 mmol) and allylZnBr (0.33 M, 1.52 mL, 0.50 mmol). the reaction was quenched after 1.5 h. Purification by flash chromatography (96:3:1 petroleum ether:Et<sub>2</sub>O:HOAc) furnished 54 mg (58%) of **13** as a clear oil. Analytical data for **13**: **IR** (thin film, cm<sup>-1</sup>) 3079, 2956, 2929, 2857, 1719, 1644, 1558, 1254, 1170; <sup>1</sup>H NMR (400 MHz, CDCl<sub>3</sub>) δ 5.84-5.73 (m, 2H), 5.13-5.07 (m, 4H), 2.63-2.60 (m, 1H), 2.48 (d, *J* = 7.2 Hz, 1H), 1.01 (d, *J* = 6.8 Hz, 1H), 0.91 (s, 9H), 0.17 (s, 3H), 0.14 (s, 3H); <sup>13</sup>C NMR (100 MHz, CDCl<sub>3</sub>) δ 179.0, 138.5, 132.9, 118.8, 116.8, 83.5, 46.2, 43.5, 26.2, 19.1, 16.0, -2.0, -2.5; **TLC** (10:90 EtOAc: petroleum ether) R<sub>f</sub> 0.28. **LRMS** (ESI) exact mass calculated for C<sub>15</sub>H<sub>28</sub>O<sub>3</sub>SiNa: 307.18. Found: 307.17.

**Proof of Stereochemistry:** Product stereochemistry was determined by ring closing metathesis and NOESY analysis of the resulting cyclopentene **25**. Experimental details are provided below.

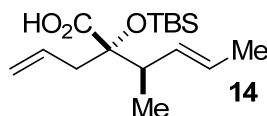

**2-allyl-2-(*tert*-butyldimethylsilyloxy)-3-methylhex-4-enoic acid (14).** General procedure C was performed using (*E*)-pent-3-en-2-yl 2-*tert*-butyldimethylsilyl glyoxylate **1c** (80 mg, 0.312 mmol) and allylZnBr (0.33 M, 1.42 mL, 0.468 mmol). Reaction was quenched after 4 h. Purification by flash chromatography (94:5:1 petroleum ether:Et<sub>2</sub>O:HOAc) furnished 61 mg (67%) of **14** as a clear oil. Analytical data for **14**: **IR** (thin film, cm<sup>-1</sup>) 3080, 2956, 2929, 2857, 1642, 1416, 1377, 1277, 1106; <sup>1</sup>H NMR (400 MHz, CDCl<sub>3</sub>) δ 5.82-5.72 (m, 1H), 5.54-5.39 (m, 2H), 5.13-5.07 (m, 2H), 2.59-2.55 (m, 1H), 2.49-2.45 (m, 2H), 1.70 (d, *J* = 6 Hz, 3H), 0.99 (d, *J* = 6.8 Hz, 3H), 0.92 (s, 9H), 0.17 (s, 3H), 0.16 (s, 3H); <sup>13</sup>C NMR (100 MHz, CDCl<sub>3</sub>) δ 179.5, 133.0, 131.0, 127.4, 118.6, 83.8, 45.7, 43.5, 26.2, 19.1, 18.1, 16.4, -2.0, -2.5; **TLC** (10:90 EtOAc: petroleum ether) R<sub>f</sub> 0.26. **LRMS** (ESI) exact mass calculated for C<sub>16</sub>H<sub>30</sub>O<sub>3</sub>SiNa: 321.20. Found: 321.18.

**Proof of Stereochemistry:** Product stereochemistry was determined by ring closing metathesis, which provided cyclopentene **25**. Experimental details are provided below.



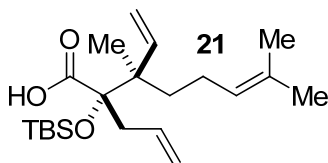

**2-allyl-2-(*tert*-butyldimethylsilyloxy)-3,7-dimethyl-3-vinyloct-6-enoic acid (21).** General procedure C was performed using geranyl *tert*-butyldimethylsilyl glyoxylate 20 (80 mg, 0.247 mmol) and allylZnBr (0.33 M, 1.12 mL, 0.370 mmol). The reaction was quenched after 2.5 h. Purification by flash chromatography (96:3:1 petroleum ether:Et<sub>2</sub>O:HOAc) furnished 59 mg (65%) of **21** as a clear oil. Analytical data for **21**: **IR** (thin film, cm<sup>-1</sup>) 3081, 2956, 2928, 2856, 1714, 1640, 1471, 1415, 1155; **<sup>1</sup>H NMR** (300 MHz, CDCl<sub>3</sub>) δ 5.90 (dd, *J* = 17.4, 10.8 Hz, 1H), 5.77-5.70 (m, 1H), 5.22-5.01 (m, 5H), 2.71 (dd, *J* = 14.4, 7.2 Hz, 1H), 2.43 (dd, *J* = 14.0, 7.2 Hz, 1H), 1.80-1.75 (m, 2H), 1.71-1.61 (m, 1H), 1.67 (s, 3H), 1.56 (s, 3H), 1.40-1.36 (m, 1H), 1.19 (s, 3H), 0.91 (s, 9H), 0.20 (s, 3H), 0.09 (s, 3H); **<sup>13</sup>C NMR** (100 MHz, CDCl<sub>3</sub>) δ 178.0, 141.8, 133.9, 133.8, 131.4, 124.6, 119.2, 115.3, 86.9, 48.2, 39.4, 34.7, 26.4, 25.7, 22.9, 19.4, 17.6, 17.1, -1.85, -2.06; **TLC** (10:90 EtOAc: petroleum ether) *R<sub>f</sub>* 0.32. **LRMS** (ESI) exact mass calculated for C<sub>21</sub>H<sub>38</sub>O<sub>3</sub>SiNa: 389.26. Found: 389.24.

**Proof of Stereochemistry:** Product stereochemistry was determined by ring closing metathesis followed by LiAlH<sub>4</sub> reduction and NOESY analysis of the resulting cyclopentene **27**. See below for experimental details.

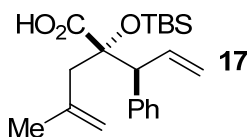

**2-(*tert*-butyldimethylsilyloxy)-4-methyl-2-(1-phenylallyl)pent-4-enoic acid (17).** General procedure C was performed using cinnamyl *tert*-butyldimethylsilyl glyoxylate (80 mg, 0.263 mmol) and methallylZnBr (0.33 M, 1.19 mL, 0.394 mmol). The reaction was quenched after 2 h. Purification by flash chromatography (96:3:1 petroleum ether:Et<sub>2</sub>O:HOAc) furnished 70 mg (74%) of **17** as a clear oil. Analytical data for **17** (1:1 mix of diastereomers): **IR** (thin film, cm<sup>-1</sup>) 3077, 3031, 2957, 2928, 2856, 1721, 1646, 1472, 1151; **<sup>1</sup>H NMR** (400 MHz, CDCl<sub>3</sub>) δ 7.37-7.21 (m, 5H), 6.39-6.33 (m, 1H), 6.27-6.18 (m, 1H), 5.28 (d, *J* = 10.4 Hz, 1H), 5.17 (d, *J* = 17.2 Hz, 1H), 5.09 (d, *J* = 4.0 Hz, 1H), 5.06 (d, *J* = 10.8 Hz, 1H), 4.88 (d, *J* = 14.8 Hz, 2H), 4.76 (d, *J* = 49.6 Hz, 2H), 3.76 (d, *J* = 9.6 Hz, 1H), 3.71 (d, *J* = 9.2 Hz, 1H), 2.69 (d, *J* = 13.6 Hz, 1H), 2.59 (d, *J* = 13.6 Hz, 1H), 2.56 (d, *J* = 13.6 Hz, 1H), 2.21 (d, *J* = 13.6 Hz, 1H), 1.72 (s, 3H), 1.67 (s, 3H), 0.97 (s, 9H), 0.92 (s, 9H), 0.11 (s, 3H), 0.10 (s, 3H), 0.05 (s, 3H), -0.19 (s, 3H); **<sup>13</sup>C NMR** (100 MHz, CDCl<sub>3</sub>) δ 140.1, 140.0, 139.9, 137.8, 136.6, 129.8, 129.4, 128.2, 127.9, 127.0, 126.9, 118.7, 117.3, 116.8, 116.5, 83.8, 83.1, 60.1, 58.2, 48.0, 47.4, 27.0, 26.8, 26.7, 23.6, 23.5, 19.5, -1.7, -1.8, -2.1, -2.5; **TLC** (10:90 EtOAc: petroleum ether) *R<sub>f</sub>* 0.21. **LRMS** (ESI) exact mass calculated for C<sub>21</sub>H<sub>32</sub>O<sub>3</sub>SiNa: 383.21. Found: 383.20.

**Proof of Stereochemistry:** Product was obtained as a 1:1 mixture of diastereomers.

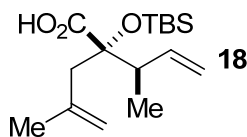

**2-(2-methyl-2-propen-1-yl)-2-(*tert*-butyldimethylsilyloxy)-4-methylpent-4-enoic acid (18).** General procedure C was performed using crotyl *tert*-butyldimethylsilyl glyoxylate **1b** (40 mg, 0.165 mmol) and methallylZnBr (0.33 M, 0.75 mL, 0.248 mmol). The reaction was quenched after 13 h. Purification by flash chromatography (96:3:1 petroleum ether:Et<sub>2</sub>O:HOAc) furnished 30 mg (61%) of **18** as a clear oil. Analytical data for **18**: **IR** (thin film, cm<sup>-1</sup>) 3078, 2957, 2929, 2856, 2360, 1719, 1646, 1472, 1161; **<sup>1</sup>H NMR** (400 MHz, CDCl<sub>3</sub>) δ 5.90-5.81 (m, 1H), 5.14-5.07 (m, 2H), 4.84 (s, 1H), 4.77 (s, 1H), 2.65-2.61 (m, 1H), 2.55 (d, *J* = 14.0 Hz, 1H), 2.46 (d, *J* = 14.0, 1H), 1.71 (s, 3H), 1.02 (d, *J* = 6.8 Hz, 3H), 0.91 (s, 9H), 0.18 (s, 3H), 0.16 (s, 3H); **<sup>13</sup>C NMR** (100 MHz, CDCl<sub>3</sub>) δ 178.1, 140.4, 138.7, 117.1, 115.7, 83.3, 47.2, 46.8, 26.4, 23.6, 19.3, 16.3, -2.0, -2.1; **TLC** (10:90 EtOAc: petroleum ether) R<sub>f</sub> 0.28. **LRMS** (ESI) exact mass calculated for C<sub>16</sub>H<sub>30</sub>O<sub>3</sub>SiNa: 321.20. Found: 321.18.

**Proof of Stereochemistry:** Product stereochemistry was assigned by analogy to allylzinc example with crotyl silyl glyoxylate.

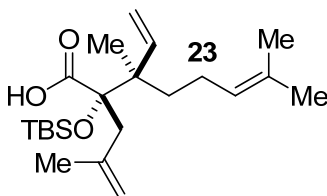

**2-(*tert*-butyldimethylsilyloxy)-3,7-dimethyl-2-(2-methylallyl)-3-vinyloct-6-enoic acid (23).** General procedure C was performed using geranyl *tert*-butyldimethylsilyl glyoxylate **20** (80 mg, 0.247 mmol) and methallylZnBr (0.33 M, 1.12 mL, 0.370 mmol). The reaction was quenched after 2 h. Purification by flash chromatography (96:3:1 petroleum ether:Et<sub>2</sub>O:HOAc) furnished 52 mg (55%) of **23** as a clear oil. Analytical data for **23**: **IR** (thin film, cm<sup>-1</sup>) 2960, 2928, 2856, 1712, 1647, 1471, 1414, 1377, 1145; **<sup>1</sup>H NMR** (300 MHz, CDCl<sub>3</sub>) δ 5.94 (dd, *J* = 17.7, 11.1 Jz, 1H), 5.24 (d, *J* = 11.1 Hz, 1H), 5.08-5.03 (m, 2H), 4.85 (s, 1H), 4.77 (s, 1H), 2.74 (d, *J* = 13.5 Hz, 1H), 2.47 (d, *J* = 13.8 Hz, 1H), 1.79-1.72 (m, 2H), 1.67 (s, 6H), 1.56 (s, 3H), 1.36-1.30 (m, 2H), 1.14 (s, 3H), 0.91 (s, 9H), 0.20 (s, 3H), 0.09 (s, 3H); **<sup>13</sup>C NMR** (100 MHz, CDCl<sub>3</sub>) δ 178.0, 142.0, 140.4, 131.3, 124.6, 116.9, 115.5, 86.1, 49.0, 43.0, 34.7, 26.9, 25.6, 23.7, 23.1, 19.9, 17.6, 17.1, -1.4, -1.9; **TLC** (10:90 EtOAc: petroleum ether) R<sub>f</sub> 0.32. **LRMS** (ESI) exact mass calculated for C<sub>22</sub>H<sub>40</sub>O<sub>3</sub>SiNa: 403.27. Found: 403.25.

**Proof of Stereochemistry:** Product stereochemistry was assigned by analogy to allylzinc example with geranyl silyl glyoxylate.

**General Procedure D for reaction of silyl glyoxylates with allenylzinc bromide:** A solution of allenylzinc bromide<sup>8</sup> (1.5 equiv) in THF (0.33 M) was diluted with Et<sub>2</sub>O to 0.10 M. The solution was cooled to -78 °C and a solution of silyl glyoxylate (1.0 equiv) in Et<sub>2</sub>O (0.10 M) was added. The reaction was allowed to slowly warm to room temperature over 1 h and then stir for 30 min to 2 h at room temperature. The reaction was diluted with 5 mL aqueous HCl (1 M). The layers were separated and the aqueous layer was extracted with CH<sub>2</sub>Cl<sub>2</sub> (3 X 10 mL). The organic extracts were combined, dried with MgSO<sub>4</sub>, and concentrated *in vacuo*. The resulting colorless oil was purified as indicated.

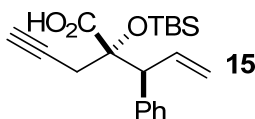

**2-(tert-butyldimethylsilyloxy)-3-phenyl-2-(prop-2-ynyl)pent-4-enoic acid (15).** General procedure D was performed using cinnamyl *tert*-butyldimethylsilyl glyoxylate **1a** (80 mg, 0.263 mmol) and allenylZnBr (0.33 M, 2.39 mL, 0.525 mmol). The reaction was quenched after 1.5 h. Purification by flash chromatography (96:3:1 petroleum ether:Et<sub>2</sub>O:HOAc) furnished 53 mg (58%) of **15** as a clear oil. Analytical data for **15**: **IR** (thin film, cm<sup>-1</sup>) 3310, 3063, 3032, 2954, 2929, 2895, 2856, 1725, 1158; **<sup>1</sup>H NMR** (400 MHz, CDCl<sub>3</sub>) δ 7.32-7.21 (m, 5H), 6.31-6.22 (m, 1H), 5.26 (d, *J* = 1.6 Hz), 5.23 (d, *J* = 8.8 Hz, 1H), 3.84 (d, *J* = 9.6 Hz, 1H), 2.79 (d, *J* = 17.2 Hz, 1H), 2.65 (d, *J* = 16.8 Hz, 1H), 2.10 (t, *J* = 2.8 Hz, 1H), 0.96 (s, 9H), 0.19 (s, 3H), 0.04 (s, 3H); **<sup>13</sup>C NMR** (100 MHz, CDCl<sub>3</sub>) δ 176.9, 139.0, 136.5, 135.5, 129.7, 129.2, 128.1, 127.3, 127.2, 118.9, 117.8, 82.4, 79.8, 72.2, 57.6, 29.7, 26.2, 19.0, -2.1, -3.0; **TLC** (10:90 EtOAc: petroleum ether) R<sub>f</sub> 0.20. **LRMS** (ESI) exact mass calculated for C<sub>20</sub>H<sub>28</sub>O<sub>3</sub>SiNa: 367.18. Found: 367.16.

**Proof of Stereochemistry:** Product was formed with low diastereoselectivity.

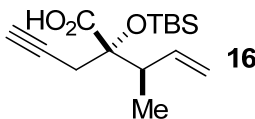

**2-(tert-butyldimethylsilyloxy)-3-methyl-2-(prop-2-ynyl)pent-4-enoic acid (16).** General procedure D was performed using crotyl *tert*-butyldimethylsilyl glyoxylate **1b** (80 mg, 0.330 mmol) and allenylZnBr (0.33 M, 3.0 mL, 0.66 mmol). The reaction was quenched after 3.5 h. Purification by flash chromatography (96:3:1 petroleum ether:Et<sub>2</sub>O:HOAc) furnished 31 mg (33%) of **16** as a clear oil. Analytical data for **16**: **IR** (thin film, cm<sup>-1</sup>) 3313, 2955, 2929, 2857, 1725, 1471, 1420, 1254, 1168; **<sup>1</sup>H NMR** (400 MHz, CDCl<sub>3</sub>) δ 5.81-5.72 (m, 1H), 5.14 (d, *J* = 14.0 Hz, 2H), 2.71-2.59 (m, 3H), 2.06 (s, 1H), 1.05 (d, *J* = 6.8 Hz, 3H), 0.93 (s, 9H), 0.24 (s, 3H), 0.22 (s, 3H); **<sup>13</sup>C NMR** (100 MHz, CDCl<sub>3</sub>) δ 176.9, 137.6, 117.6, 82.7, 79.8,

72.1, 46.4, 29.1, 26.1, 18.9, 15.7, -2.2, -2.7; **TLC** (10:90 EtOAc: petroleum ether)  $R_f$  0.18. **LRMS** (ESI) exact mass calculated for  $C_{15}H_{26}O_3SiNa$ : 305.17. Found: 305.12.

**Proof of Stereochemistry:** Product stereochemistry was determined by Lindlar reduction to afford 2-allyl-2-(tert-butyldimethylsilyloxy)-3-methylpent-4-enoic acid **13** characterized above.

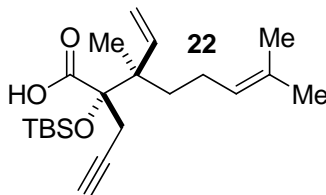

**2-(tert-butyldimethylsilyloxy)-3,7-dimethyl-2-(prop-2-ynyl)-3-vinyloct-6-enoic acid (22).** General procedure D was performed using geranyl *tert*-butyldimethylsilyl glyoxylate **20** (80 mg, 0.247 mmol) and allenylZnBr (0.30 M, 1.64 mL, 0.493 mmol). The reaction was quenched after 2 h. Purification by flash chromatography (96:3:1 petroleum ether:Et<sub>2</sub>O:HOAc) furnished 24 mg (27%) of **22** as a clear oil. Analytical data for **22**: **IR** (thin film, cm<sup>-1</sup>) 3312, 2956, 2928, 2856, 1717, 1471, 1415, 1378, 1150; **<sup>1</sup>H NMR** (400 MHz, CDCl<sub>3</sub>)  $\delta$  5.85 (dd,  $J = 17.6, 10.8$  Hz, 1H), 5.23 (d,  $J = 11.2$  Hz, 1H), 5.06-5.02 (m, 2H), 2.94 (dd,  $J = 16.8, 2.4$  Hz, 1H), 2.46 (dd,  $J = 16.8, 2.4$  Hz, 1H), 2.00-1.98 (m, 1H), 1.78-1.70 (m, 2H), 1.66 (s, 3H), 1.55 (s, 3H), 1.39-1.31 (m, 1H), 1.10 (s, 3H), 0.94 (s, 9H), 0.28 (s, 3H), 0.23 (s, 3H). **<sup>13</sup>C NMR** (100 MHz, CDCl<sub>3</sub>)  $\delta$  175.4, 140.8, 131.5, 124.4, 116.0, 86.2, 81.2, 72.1, 48.1, 34.5, 26.3, 25.7, 19.2, 17.6, 17.1, -2.3, -2.4; **TLC** (10:90 EtOAc: petroleum ether)  $R_f$  0.24. **LRMS** (ESI) exact mass calculated for  $C_{21}H_{36}O_3SiNa$ : 387.24. Found: 387.22.

**Proof of Stereochemistry:** Product stereochemistry was determined by Lindlar reduction to afford 2-allyl-2-(tert-butyldimethylsilyloxy)-3,7-dimethyl-3-vinyloct-6-enoic acid **21** characterized above.

#### IV. Experimental Details for Cyclizations:

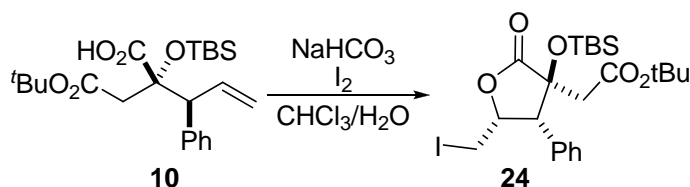

#### ***tert*-Butyl-3-(*tert*-butyldimethylsilyloxy)-5-(iodomethyl)-2-oxo-4-**

**phenyltetrahydrofuran-3-yl)acetate (**24**).** To acid **10** (12 mg, 0.0285 mmol, 1.0 equiv) in 2.0 mL CHCl<sub>3</sub> was added NaHCO<sub>3</sub> (20 mg, 0.239 mmol, 8.4 equiv) in 2.0 mL H<sub>2</sub>O. The reaction was cooled to 0 °C and iodine (62 mg, 0.245 mmol, 8.6 equiv) was added. The reaction was allowed to warm to room temperature and stirred 24 h. The reaction was diluted with 5 mL CH<sub>2</sub>Cl<sub>2</sub> and the layers were separated. The organic phase was washed with 3 mL 10% Na<sub>2</sub>S<sub>2</sub>O<sub>3</sub> (aq), then 3 mL H<sub>2</sub>O, then 3 mL brine. The organic phase was dried with MgSO<sub>4</sub> and concentrated *in vacuo*. Purification by flash chromatography (90:10 petroleum ether:EtOAc) furnished 12 mg (77%) of **24**. Analytical data for **24**: **IR** (thin film, cm<sup>-1</sup>) 2953, 2930, 2857, 1786, 1737, 1558, 1495, 1257, 1153; **<sup>1</sup>H NMR** (400 MHz, CDCl<sub>3</sub>) δ 7.29-7.27 (m, 3H), 7.14-7.12 (m, 2H), 5.25-5.20 (m, 1H), 4.15 (d, *J* = 4.8 Hz, 1H), 3.30 (dd, *J* = 10.0, 6.0 Hz, 1H), 2.83-2.79 (m, 2H), 2.19 (d, *J* = 17.6 Hz, 1H), 1.33 (s, 9H), 0.92 (s, 9H), 0.20 (s, 3H), 0.14 (s, 3H); **<sup>13</sup>C NMR** (125 MHz, CDCl<sub>3</sub>) δ 175.4, 167.4, 133.0, 128.6, 128.0, 82.1, 80.9, 80.2, 57.6, 38.1, 28.0, 25.5, 18.3, 0.9, -3.3, -4.9; **TLC** (5:95 EtOAc: petroleum ether) R<sub>f</sub> 0.30. **LRMS** (ESI) exact mass calculated for C<sub>23</sub>H<sub>35</sub>IO<sub>5</sub>SiNa: 569.13. Found: 569.11.

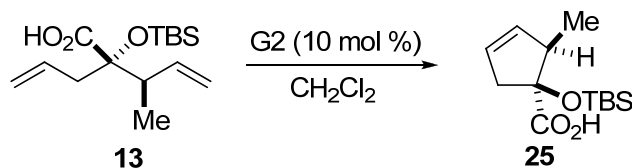

**1-(*tert*-butyldimethylsilyloxy)-2-methylcyclopent-3-enecarboxylic acid (**25**).** To diene **13** (12 mg, 0.0421 mmol, 1.0 equiv) in 1.9 mL CH<sub>2</sub>Cl<sub>2</sub> was added Grubbs 2<sup>nd</sup> generation catalyst (3.6 mg, 0.00421 mmol, 0.10 equiv) in 0.90 mL CH<sub>2</sub>Cl<sub>2</sub>. The reaction was diluted with 2.8 mL CH<sub>2</sub>Cl<sub>2</sub> and stirred at room temperature for 50 h. Approximately 200 mg silica was added and the reaction was stirred for 15 min. The slurry was filtered through a silica plug and concentrated *in vacuo* to afford 5 mg (46%) cyclopentene **25**. Analytical data for **25**: **IR** (thin film, cm<sup>-1</sup>) 2930, 2858, 2349, 1708, 1472, 1256, 1201, 837; **<sup>1</sup>H NMR** (400 MHz, CDCl<sub>3</sub>) δ 5.70-5.69 (m, 1H), 5.56-5.54 (m, 1H), 3.02-2.97 (m, 2H), 2.54 (d, *J* = 18.0 Hz, 1H), 1.05 (d, *J* = 7.5 Hz, 3H), 0.93 (s, 9H), 0.31 (s, 3H), 0.30 (s, 3H); **<sup>13</sup>C NMR** (100 MHz, CDCl<sub>3</sub>) δ 177.5, 133.9, 126.6, 81.9, 49.1, 46.1, 25.4, 17.7, 15.3, 12.6, -4.9, -5.0; **TLC** (10:90 EtOAc: petroleum ether) R<sub>f</sub> 0.27. **LRMS** (ESI) exact mass calculated for C<sub>13</sub>H<sub>24</sub>O<sub>3</sub>SiNa: 279.15. Found: 279.13.

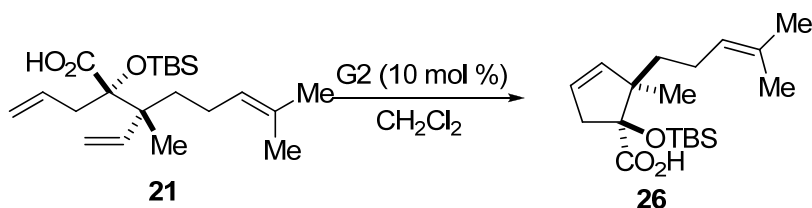

**1-(*tert*-butyldimethylsilyloxy)-2-methyl-2-(4-methylpent-3-enyl)cyclopent-3-**

**enecarboxylic acid (26).** To triene **21** (24 mg, 0.0654 mmol, 1.0 equiv) in 2.9 mL CH<sub>2</sub>Cl<sub>2</sub> was added Grubbs 2<sup>nd</sup> generation catalyst (5.6 mg, 0.00654 mmol, 0.10 equiv) in 1.4 mL CH<sub>2</sub>Cl<sub>2</sub>. The reaction was diluted with 4.3 mL CH<sub>2</sub>Cl<sub>2</sub> and stirred at room temperature for 15 h. Approximately 300 mg silica was added and the reaction was stirred for 15 min. The slurry was filtered through a silica plug (CH<sub>2</sub>Cl<sub>2</sub>) and concentrated *in vacuo*. Purification by flash chromatography (94:5:1 petroleum ether: Et<sub>2</sub>O: HOAc) afforded 13 mg (59%) cyclopentene **26**. Analytical data for **26**: **IR** (thin film, cm<sup>-1</sup>) 2926, 2349, 1700, 1684, 1653, 1558, 1541, 1507, 1457; **<sup>1</sup>H NMR** (300 MHz, CDCl<sub>3</sub>) δ 5.65-5.58 (m, 2H), 5.11-5.06 (m, 1H), 3.22 (d, *J* = 17.4 Hz, 1H), 2.54 (dd, *J* = 16.8, 6.3 Hz, 1H), 2.04-1.95 (m, 2H), 1.68 (s, 3H), 1.63 (s, 3H), 1.54-1.44 (m, 2H), 1.00 (s, 3H), 0.91 (s, 9H), 0.14 (s, 3H), 0.10 (s, 3H); **<sup>13</sup>C NMR** (100 MHz, CDCl<sub>3</sub>) δ 170.0, 137.4, 125.2, 124.9, 100.1, 55.5, 42.7, 35.1, 29.7, 25.9, 25.6, 23.7, 22.7, 21.1, 18.5, 17.7, -3.1, -3.6; **TLC** (10:90 EtOAc: petroleum ether) R<sub>f</sub> 0.21. **LRMS** (ESI) exact mass calculated for C<sub>19</sub>H<sub>34</sub>O<sub>3</sub>Si: 471.13. Found: 471.27.

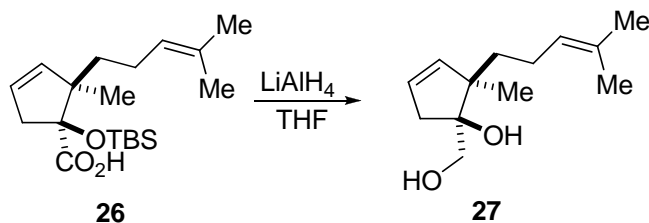

**1-(hydroxymethyl)-2-methyl-2-(4-methylpent-3-enyl)cyclopent-3-enol (27).** To acid **26** (10 mg, 0.0295 mmol, 1.0 equiv) in 0.5 mL THF at 0 °C was added LiAlH<sub>4</sub> (44 μL, 0.044 mmol, 1.5 equiv, 1 M in THF). The reaction was allowed to warm to room temperature and stirred 19 h. The reaction was quenched with 1 mL 3 M NaOH (aq). The aqueous layer was extracted with CH<sub>2</sub>Cl<sub>2</sub> (3 X 3 mL). The organic extracts were combined, dried with MgSO<sub>4</sub>, and concentrated *in vacuo*. Purification by flash chromatography (49:50:1 petroleum ether:Et<sub>2</sub>O:HOAc) furnished 5 mg (52%) of **27**. Analytical data for **27**: **IR** (thin film, cm<sup>-1</sup>) 2958, 2922, 1771, 1732, 1635, 1558, 1489, 1376, 1078; **<sup>1</sup>H NMR** (400 MHz, CDCl<sub>3</sub>) δ 5.69-5.64 (m, 2H), 5.15-5.11 (m, 1H), 3.79-3.75 (m, 1H), 3.66-3.60 (m, 1H), 2.62 (d, *J* = 16.8 Hz, 1H), 2.35 (d, *J* = 16.8 Hz, 1H), 2.10-1.95 (m, 2H), 1.68 (s, 3H), 1.64 (s, 3H), 1.51-1.46 (m, 2H), 0.93 (s, 3H); **<sup>13</sup>C NMR** (100 MHz, CDCl<sub>3</sub>) δ 139.2, 131.3, 125.7, 125.1, 84.0, 66.3, 52.1, 43.5, 35.0, 25.6, 23.9, 20.0, 17.6; **TLC** (30:70 EtOAc: petroleum ether) R<sub>f</sub> 0.15. **LRMS** (ESI) exact mass calculated for C<sub>13</sub>H<sub>22</sub>O<sub>2</sub>Na: 233.26. Found: 233.12.

## V. Literature Cited

- (1) Alaimo, P. J.; Peters, D. W.; Arnold, J.; Bergman, R. G., *J. Chem. Ed.* **2001**, 78, 64.
- (2) Nicewicz, D. A.; Breteche, G.; Johnson, J. S. *Org. Synth.* **2008**, 85, 278-286.
- (3) Haynes, R. K.; Au-Yeung, T.; Chan, W.; Lam, W.; Li, Z.; Yeung, L.; Chan, A. S. C.; Li, P.; Koen, M.; Mitchell, C. R.; Vonwiller, S. C. *Eur. J. Org. Chem.* **2000**, 2000, 3205-3216.
- (4) Kaur, P.; Singh, P.; Kumar, S. *Tetrahedron*, **2005**, 61, 8231-8240.
- (5) Bartlett, P. A.; Tanzella, D. J.; Barstow, J. F. *J. Org. Chem.* **1982**, 47, 3941-3945.
- (6) Yanagisawa, A.; Habaue, S.; Yamamoto, H. *J. Am. Chem. Soc.* **1989**, 111, 366-368.
- (7) Methallylzinc bromide was prepared from methallyl bromide using the same procedure as for allylzinc bromide.
- (8) Petrini, M.; Profeta, R.; Righi, P. *J. Org. Chem.* **2002**, 67, 4530-4535.

# VI. NMR Spectra

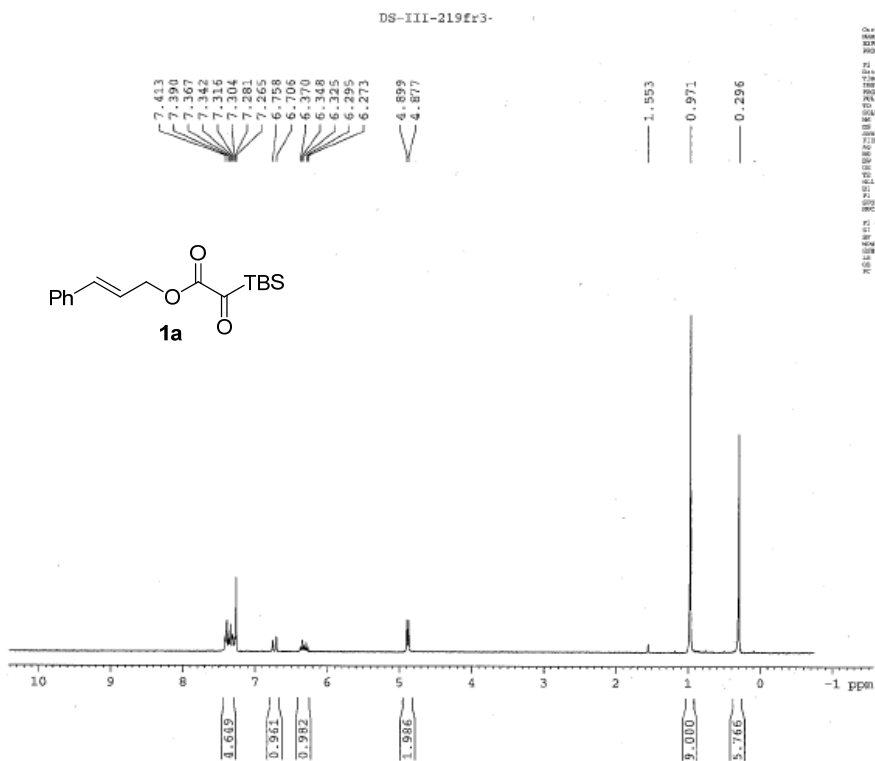

```

Current Data Parameters
NAME DS-III-219fr3
EXPNO 1
PROCNO 1

F2 - Acquisition Parameters
Date_ 20091006
Time 8.05
INSTRUM spect
PROBHD 5 mm QNP 1H/1
PULPROG zgpg30
TD 32768
SOLVENT CDCl3
NS 951
DS 2
SWH 23980.814 Hz
FIDRES 0.731836 Hz
AQ 0.6832628 sec
RG 16384
DW 20.850 usec
DE 6.00 usec
TE 300.0 K
D1 1.00000000 sec
d11 0.03000000 sec
DELTA 0.89999998 sec
TDO 1

===== CHANNEL f1 =====
NUC1 13C
P1 7.25 usec
PL1 0.00 dB
SFO1 100.5499620 MHz

===== CHANNEL f2 =====
CPDPRG2 waltz16
NUC2 1H
PCPD2 90.00 usec
PL2 -3.00 dB
PL12 16.72 dB
PL13 20.00 dB
SFO2 399.8415994 MHz

F2 - Processing parameters
SI 32768
SF 100.5398511 MHz
WDW EM
SSB 0
LB 1.00 Hz
GB 0
PC 1.40
    
```

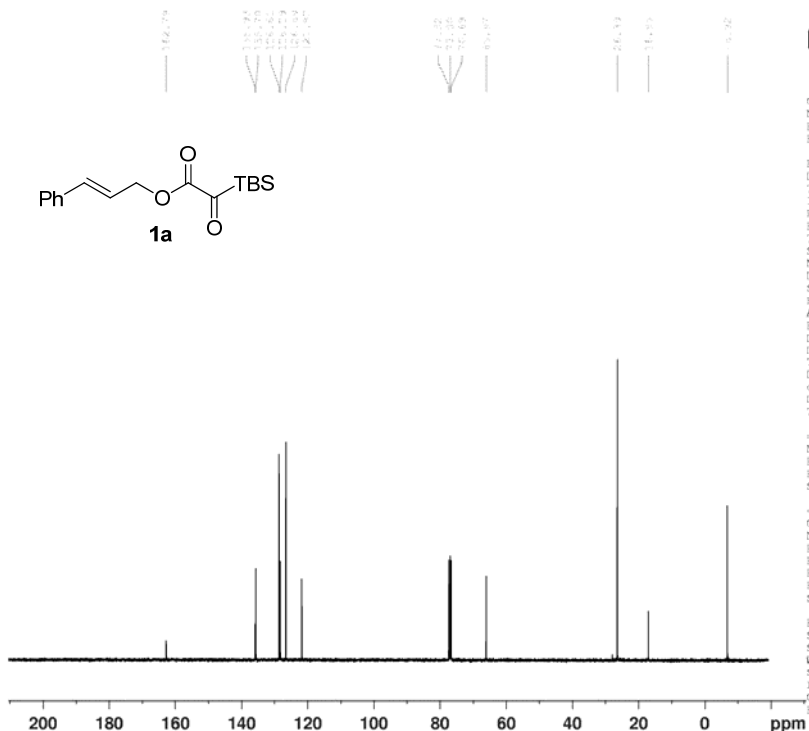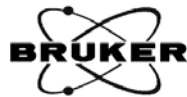

```

Current Data Parameters
NAME DS-III-219
EXPNO 1
PROCNO 1

F2 - Acquisition Parameters
Date_ 20091006
Time 8.05
INSTRUM spect
PROBHD 5 mm QNP 1H/1
PULPROG zgpg30
TD 32768
SOLVENT CDCl3
NS 951
DS 2
SWH 23980.814 Hz
FIDRES 0.731836 Hz
AQ 0.6832628 sec
RG 16384
DW 20.850 usec
DE 6.00 usec
TE 300.0 K
D1 1.00000000 sec
d11 0.03000000 sec
DELTA 0.89999998 sec
TDO 1

===== CHANNEL f1 =====
NUC1 13C
P1 7.25 usec
PL1 0.00 dB
SFO1 100.5499620 MHz

===== CHANNEL f2 =====
CPDPRG2 waltz16
NUC2 1H
PCPD2 90.00 usec
PL2 -3.00 dB
PL12 16.72 dB
PL13 20.00 dB
SFO2 399.8415994 MHz

F2 - Processing parameters
SI 32768
SF 100.5398511 MHz
WDW EM
SSB 0
LB 1.00 Hz
GB 0
PC 1.40
    
```



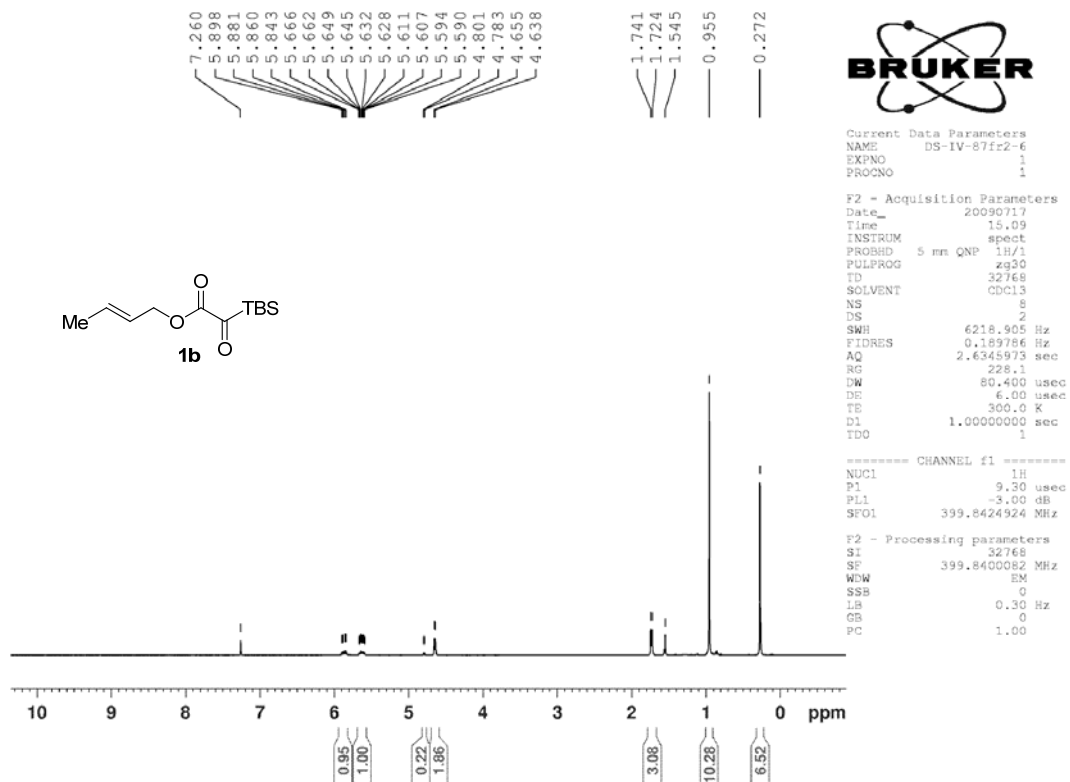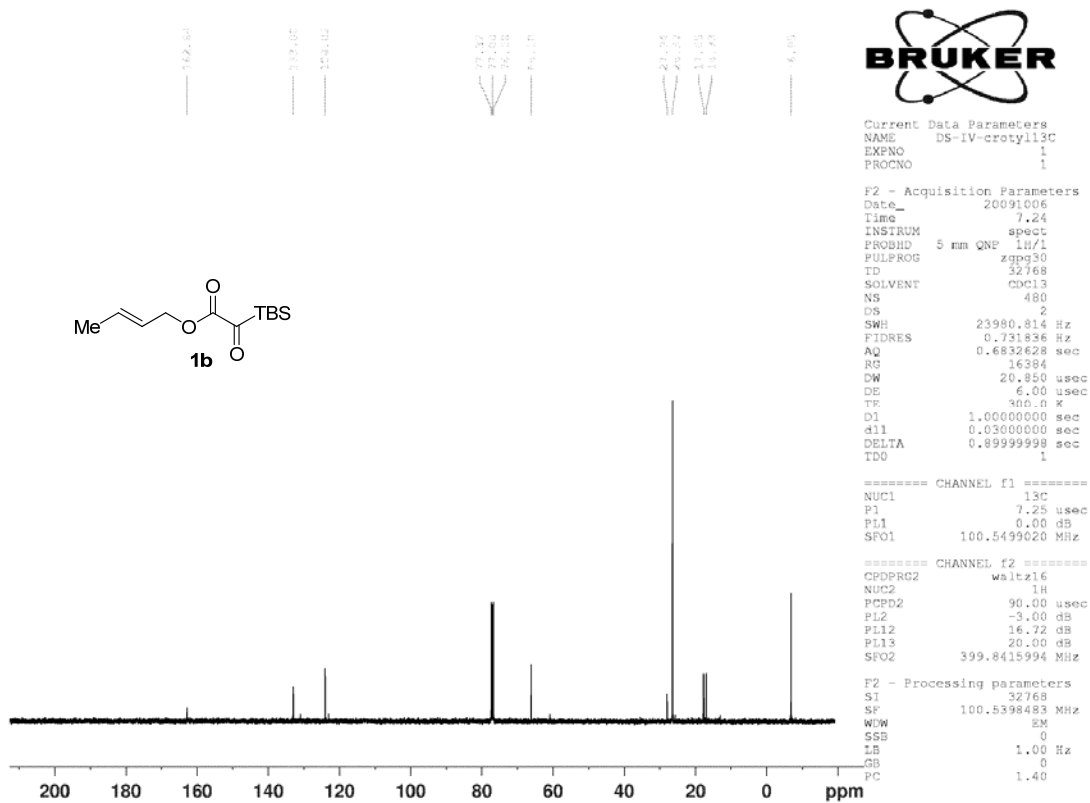

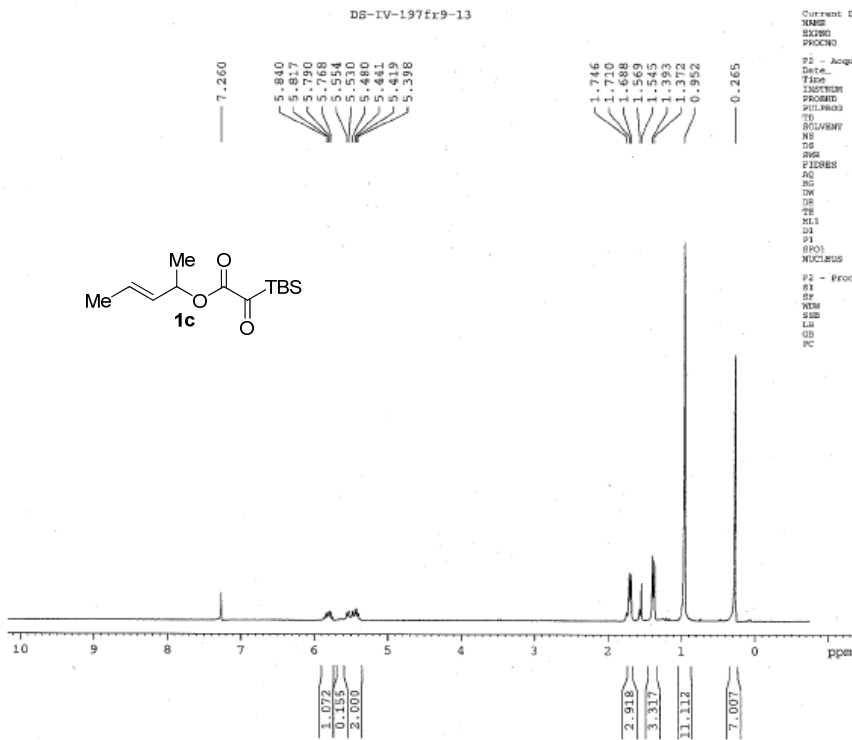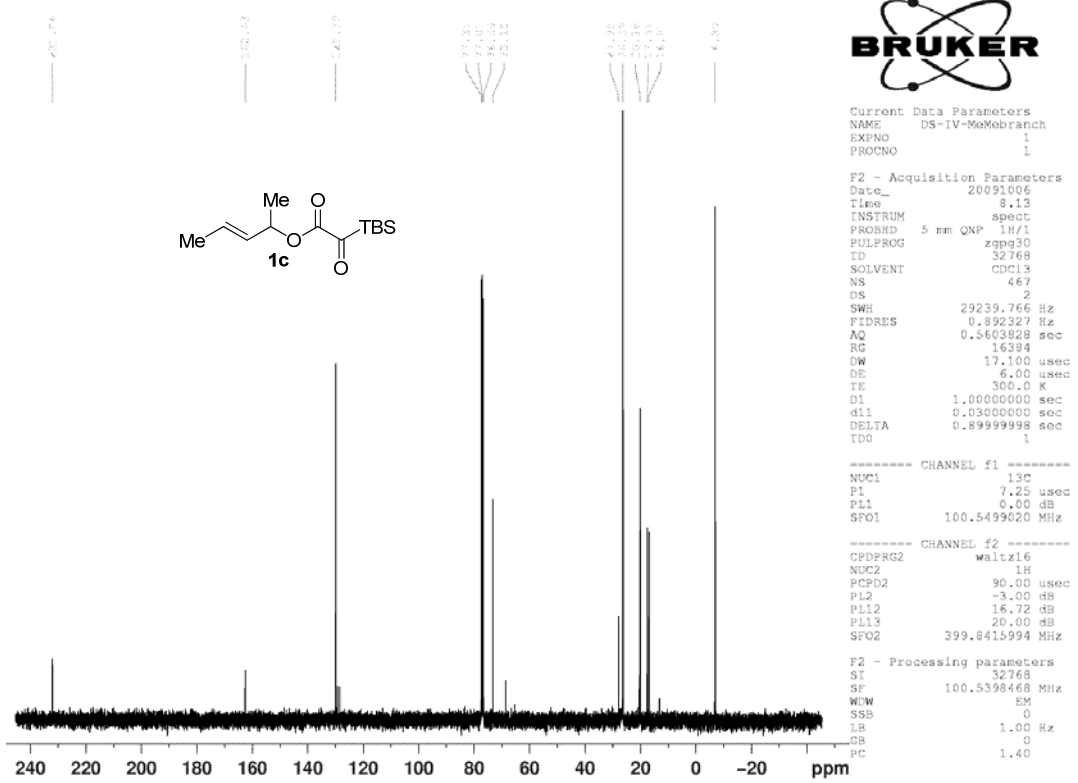

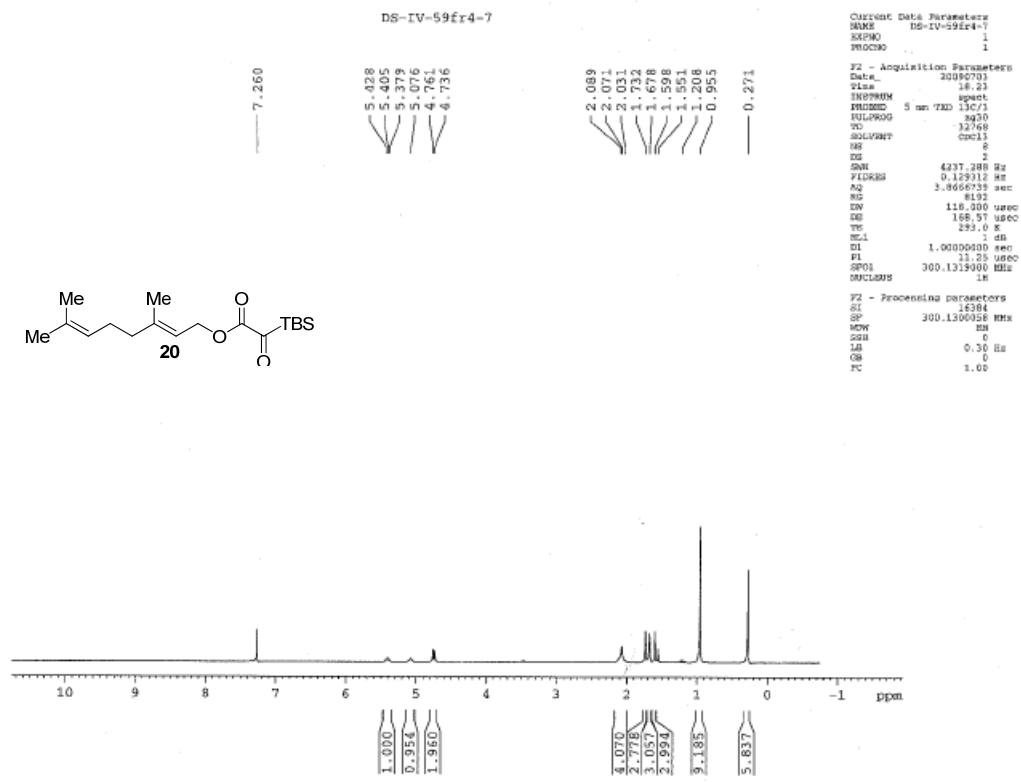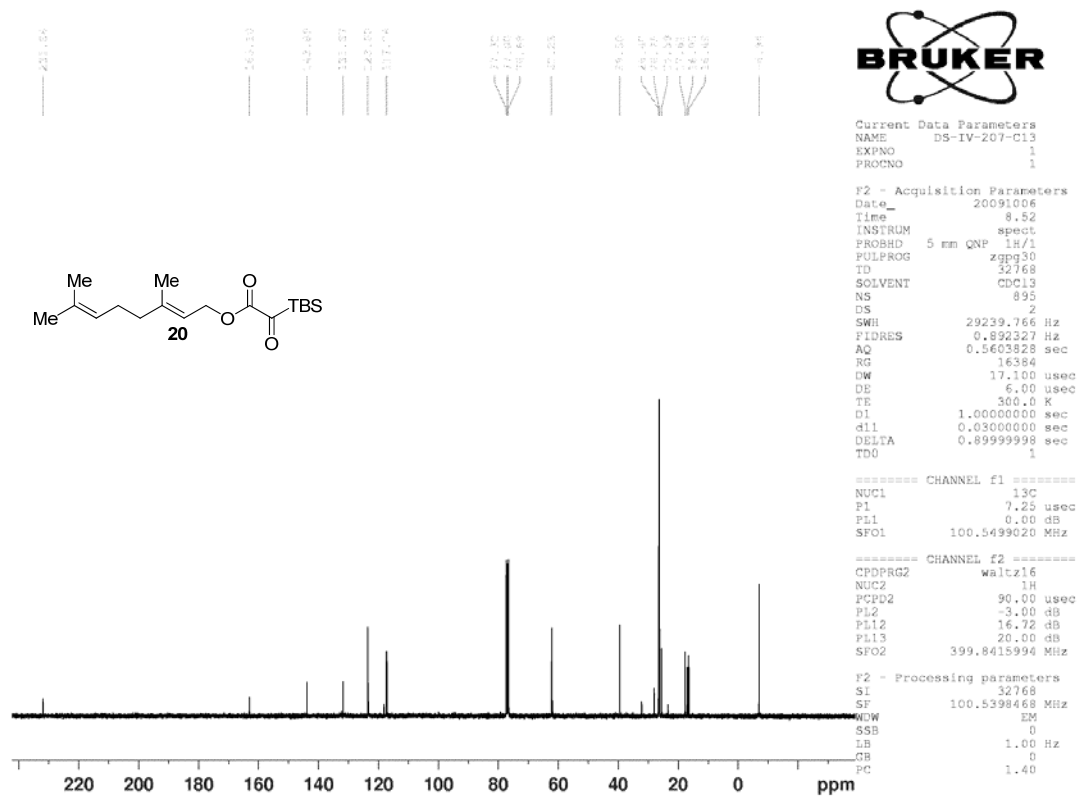



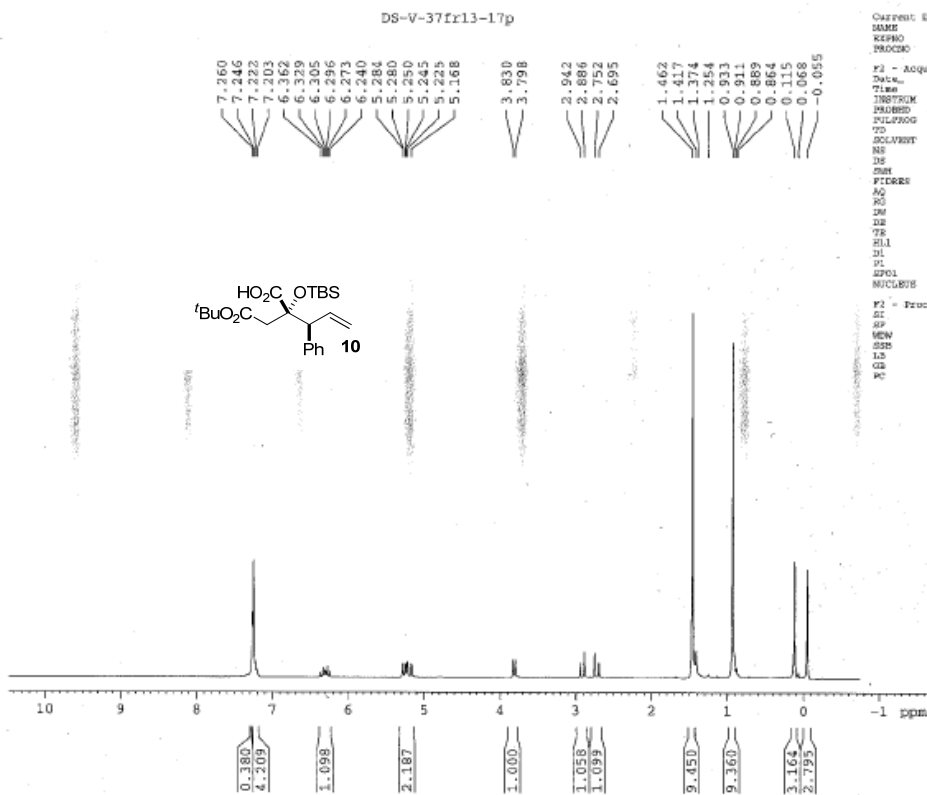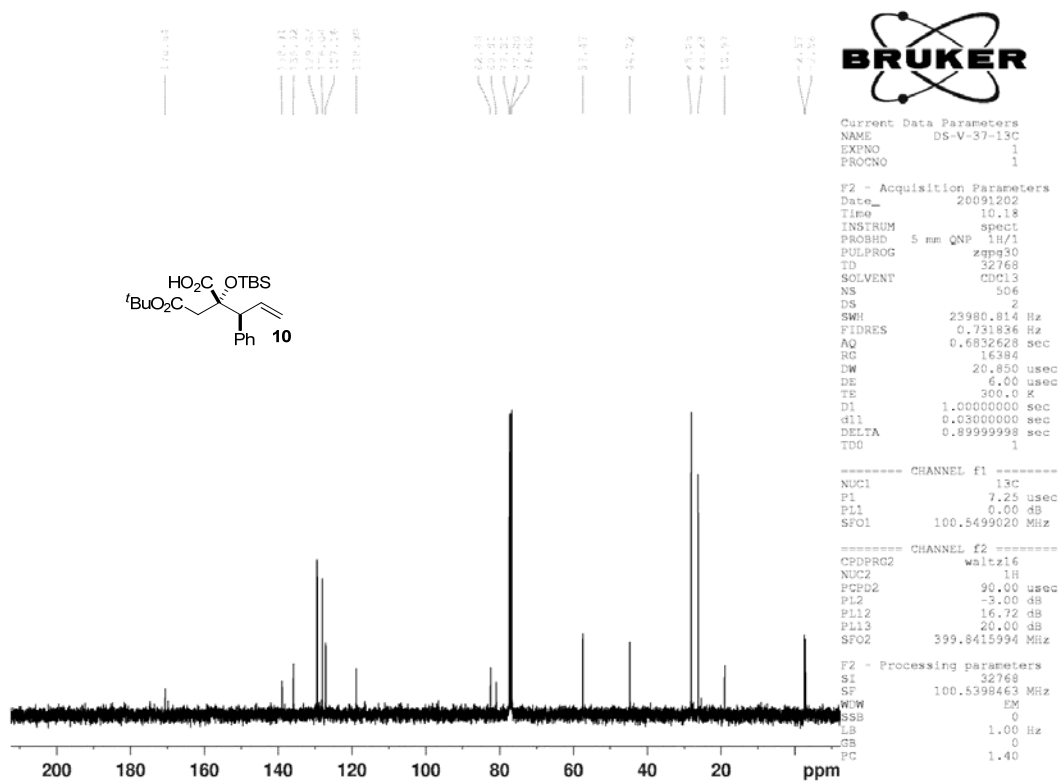



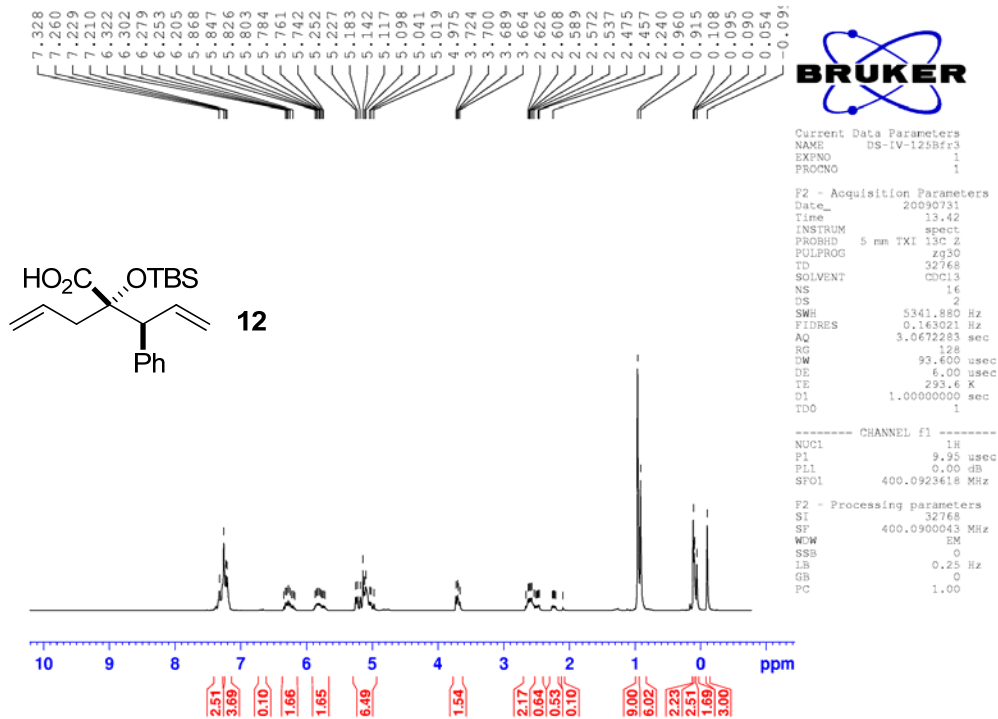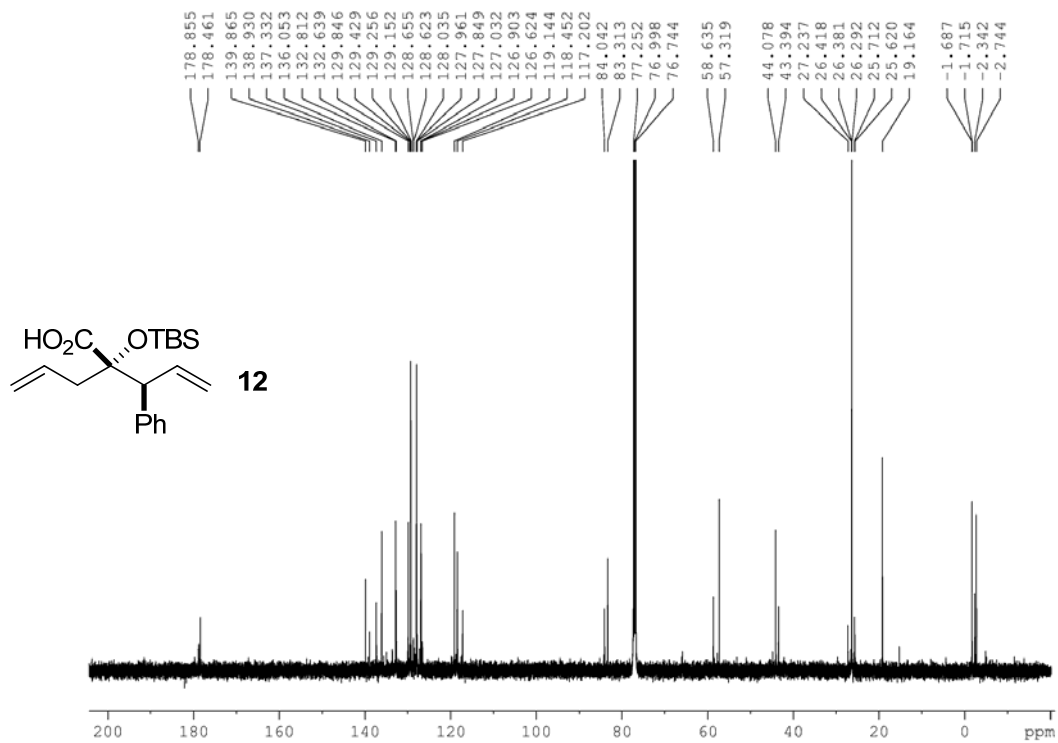

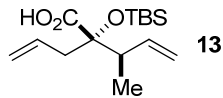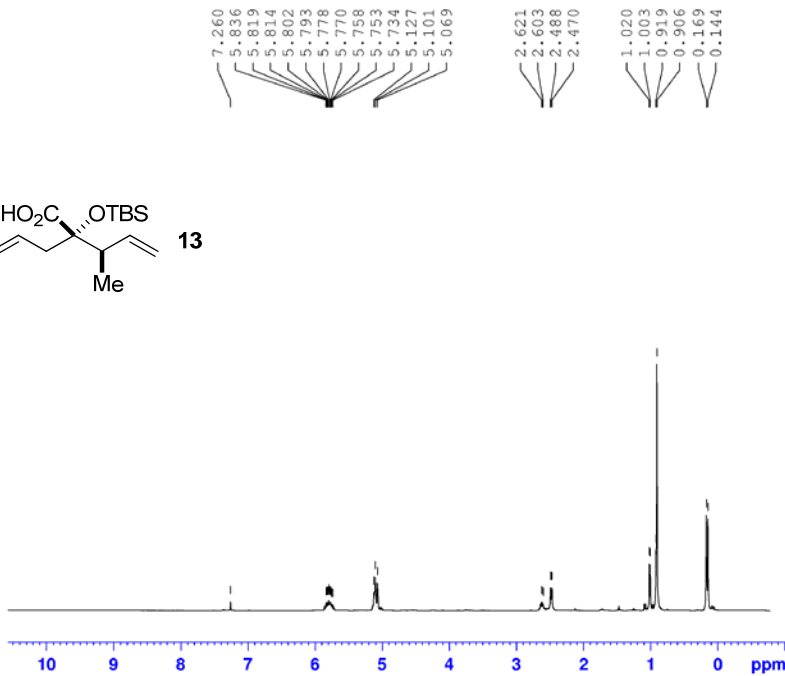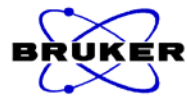

Current Data Parameters  
 NAME DS-IV-289fr4-6p  
 EXPNO 1  
 PROCNO 1  
 F2 - Acquisition Parameters  
 Date\_ 20091028  
 Time 15.15  
 INSTRUM spect  
 PROBHD 5 mm TXI 13C Z  
 PULPROG zg30  
 TD 32768  
 SOLVENT CDCl3  
 NS 8  
 DS 2  
 SWH 5341.880 Hz  
 FIDRES 0.165021 Hz  
 AQ 3.0672283 sec  
 RG 35.9  
 DW 93.600 usec  
 DE 6.00 usec  
 TE 293.9 K  
 D1 1.00000000 sec  
 TDO 1  
 ===== CHANNEL f1 =====  
 NUC1 1H  
 P1 9.95 usec  
 PL1 0.00 dB  
 SFO1 400.0923618 MHz  
 F2 - Processing parameters  
 SI 32768  
 SF 400.0900040 MHz  
 WCW EM  
 SSB 0  
 LB 0.25 Hz  
 GB 0  
 PC 1.00

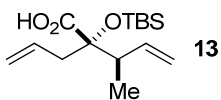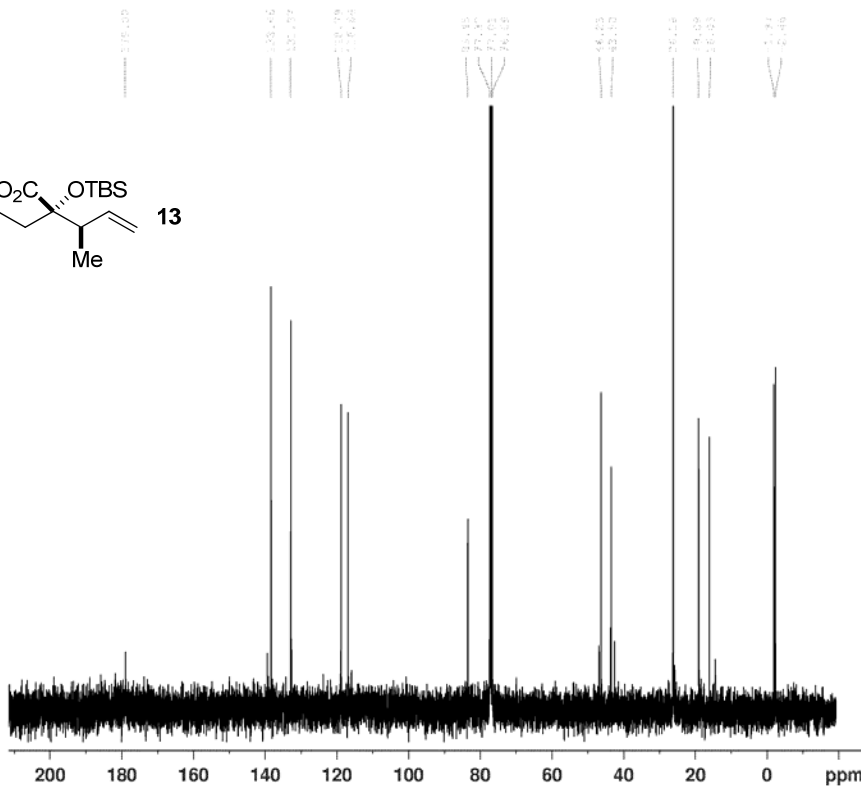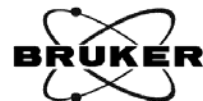

Current Data Parameters  
 NAME DS-IV-289fr4-6C  
 EXPNO 1  
 PROCNO 1  
 F2 - Acquisition Parameters  
 Date\_ 20091028  
 Time 13.44  
 INSTRUM spect  
 PROBHD 5 mm QNP 1H/1  
 PULPROG zgpg30  
 TD 32768  
 SOLVENT CDCl3  
 NS 532  
 DS 2  
 SWH 23980.814 Hz  
 FIDRES 0.731836 Hz  
 AQ 0.6832628 sec  
 RG 16384  
 DW 20.850 usec  
 DE 6.00 usec  
 TE 300.0 K  
 D1 1.00000000 sec  
 d11 0.03000000 sec  
 DELTA 0.89999998 sec  
 TDO 1  
 ===== CHANNEL f1 =====  
 NUC1 13C  
 P1 7.25 usec  
 PL1 0.00 dB  
 SFO1 100.5499020 MHz  
 ===== CHANNEL f2 =====  
 CPDPRG2 waltz16  
 NUC2 1H  
 PCPD2 90.00 usec  
 PL2 -3.00 dB  
 PLL2 16.72 dB  
 PLL3 20.00 dB  
 SFO2 399.8415994 MHz  
 F2 - Processing parameters  
 SI 32768  
 SF 100.5398453 MHz  
 WCW EM  
 SSB 0  
 LB 1.00 Hz  
 GB 0  
 PC 1.40



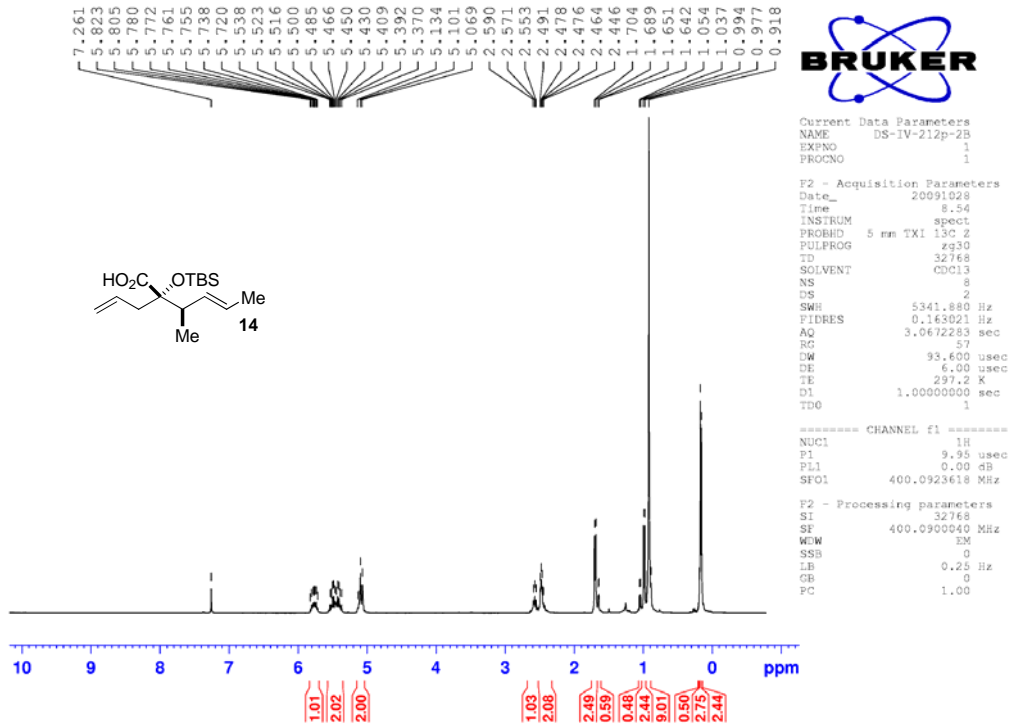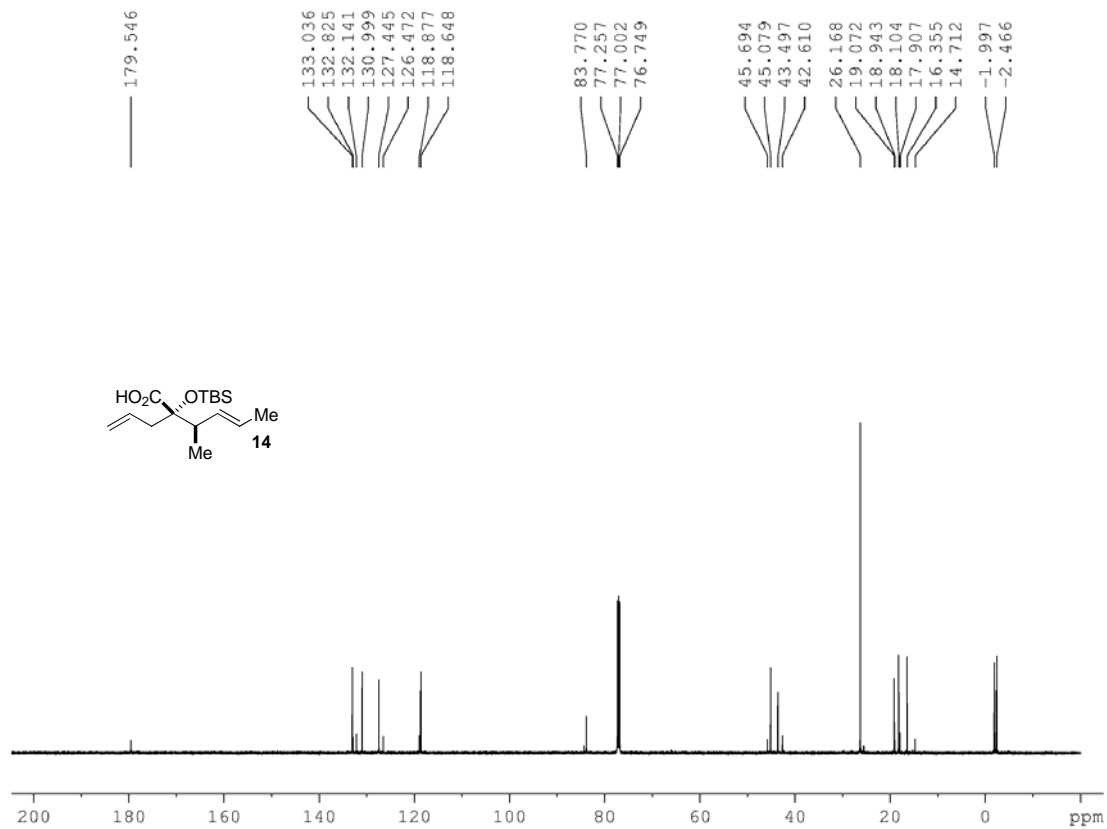

7.260  
5.932  
5.905  
5.888  
5.861  
5.767  
5.760  
5.742  
5.725  
5.718  
5.708  
5.700  
5.223  
5.196  
5.124  
5.074  
5.053  
5.009  
2.743  
2.725  
2.707  
2.690  
2.455  
2.444  
2.426  
2.409  
2.391  
1.777  
1.701  
1.669  
1.641  
1.627  
1.607  
1.561  
1.400  
1.384  
1.373  
1.356  
1.257  
1.138  
1.120  
0.911  
0.203  
0.091

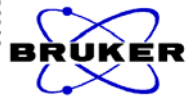

Current Data Parameters  
 NAME DS-IV-213p  
 EXPNO 1  
 PROCNO 1

F2 - Acquisition Parameters  
 Date\_ 20090909  
 Time 16.13  
 INSTRUM spect  
 PROBRD 5 mm TXI 13C Z  
 PULPROG zg30  
 TD 32768  
 SOLVENT CDCl3  
 NS 16  
 DS 2  
 SWE 5341.880 Hz  
 FIDRES 0.163021 Hz  
 AQ 3.0672283 sec  
 RG 64  
 DW 93.600 usec  
 DE 6.00 usec  
 TE 298.0 K  
 D1 1.0000000 sec  
 TDO 1

----- CHANNEL f1 -----  
 NUC1 1H  
 P1 9.95 usec  
 PL1 0.00 dB  
 SFO1 400.0923618 MHz

F2 - Processing parameters  
 SI 32768  
 SF 400.0900037 MHz  
 WDW EM  
 SSB 0  
 LB 0.25 Hz  
 GB 0  
 PC 1.00

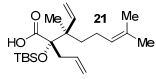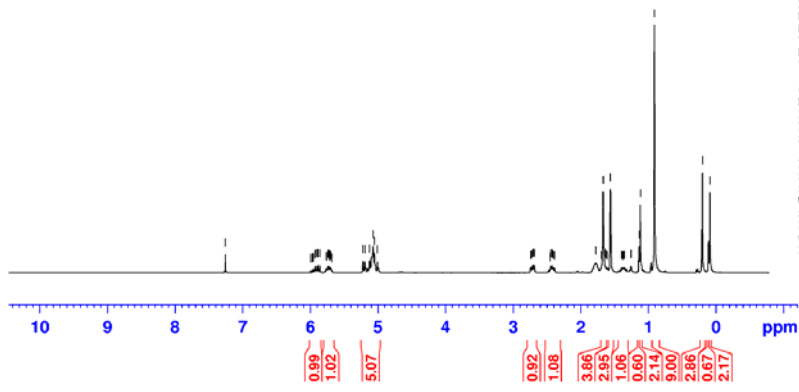

178.030  
142.107  
141.755  
133.869  
133.799  
131.376  
124.567  
119.175  
119.126  
115.277  
114.969  
86.913  
77.256  
77.002  
76.748  
48.222  
48.179  
39.427  
39.352  
35.014  
34.720  
26.436  
26.397  
25.670  
25.558  
22.940  
22.907  
19.476  
19.445  
17.586  
17.066  
16.544  
-1.758  
-1.853  
-2.057

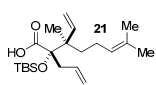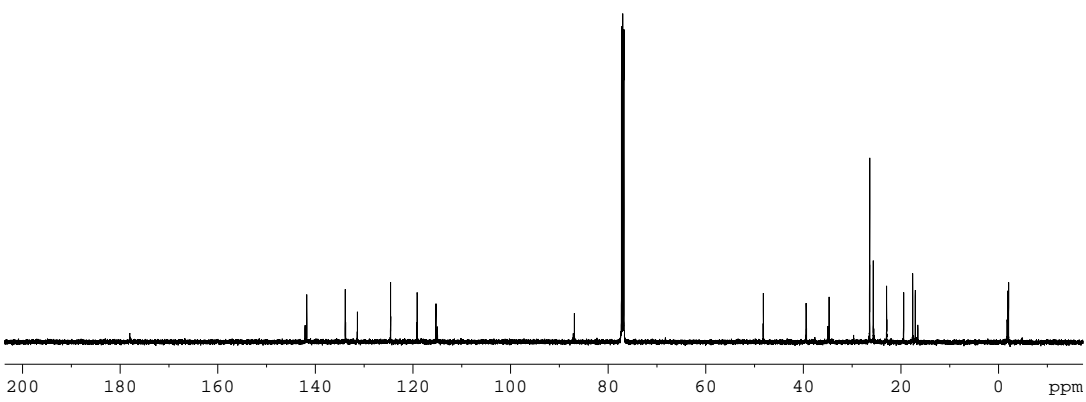

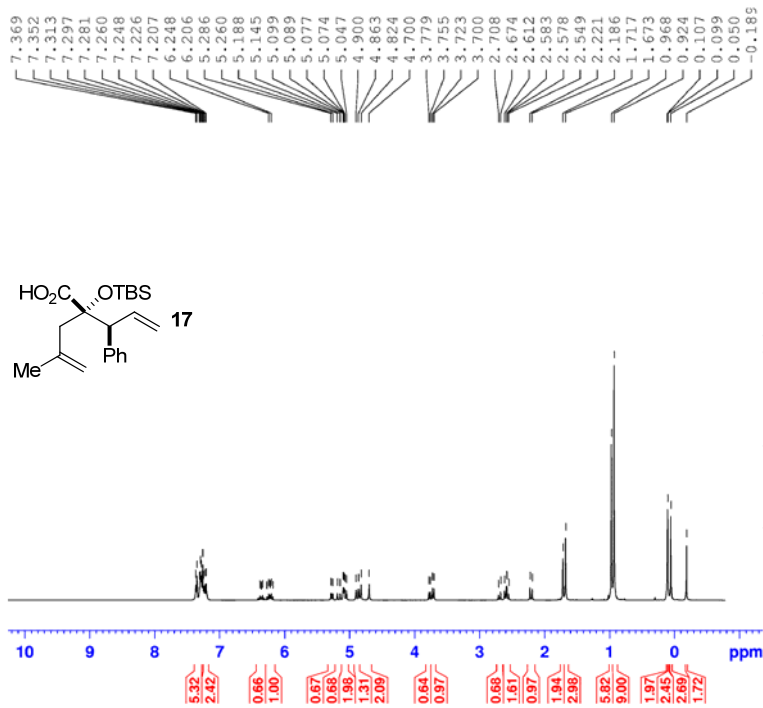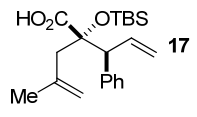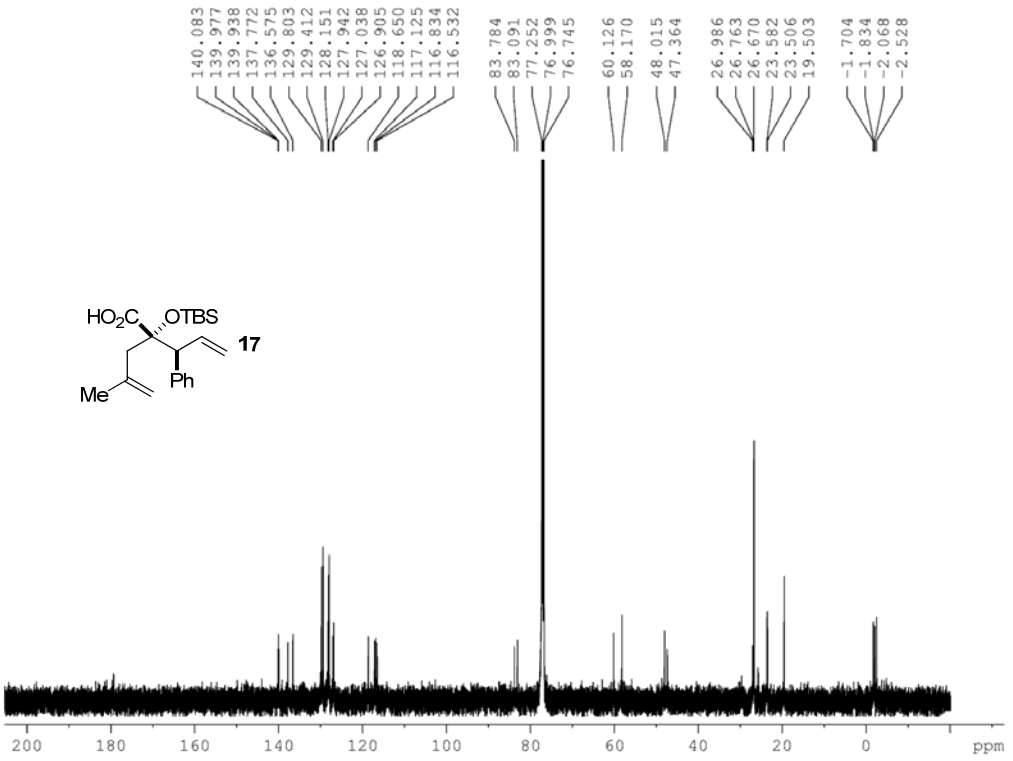

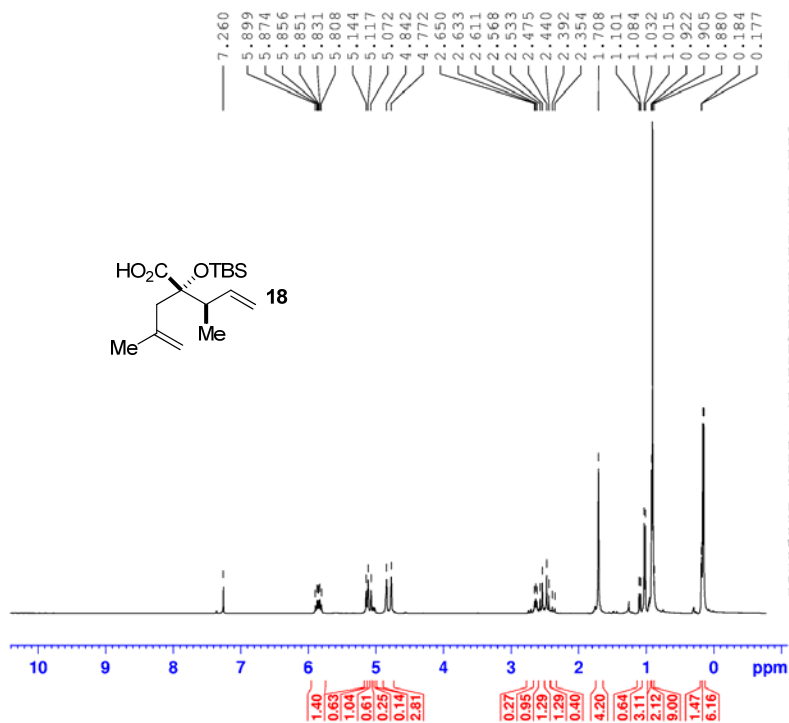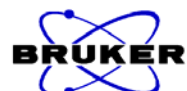

Current Data Parameters  
 NAME DS-IV-287fr7-14p  
 EXPNO 1  
 PROCNO 1

F2 - Acquisition Parameters  
 Date\_ 20091027  
 Time 18.26  
 INSTRUM spect  
 PROBHD 5 mm TXI 13C Z  
 PULPROG zg30  
 TD 32768  
 SOLVENT CDCl3  
 NS 8  
 DS 2  
 SWH 5341.880 Hz  
 FIDRES 0.163021 Hz  
 AQ 3.0672283 sec  
 RG 57  
 DW 93.600 usec  
 DE 6.00 usec  
 TE 296.9 K  
 D1 1.00000000 sec  
 TDO 1

----- CHANNEL f1 -----  
 NUC1 1H  
 P1 9.95 usec  
 PL1 0.00 dB  
 SFO1 400.0923618 MHz

F2 - Processing parameters  
 SI 32768  
 SF 400.0900038 MHz  
 WDW EM  
 SSB 0  
 LB 0.25 Hz  
 GB 0  
 PC 1.00

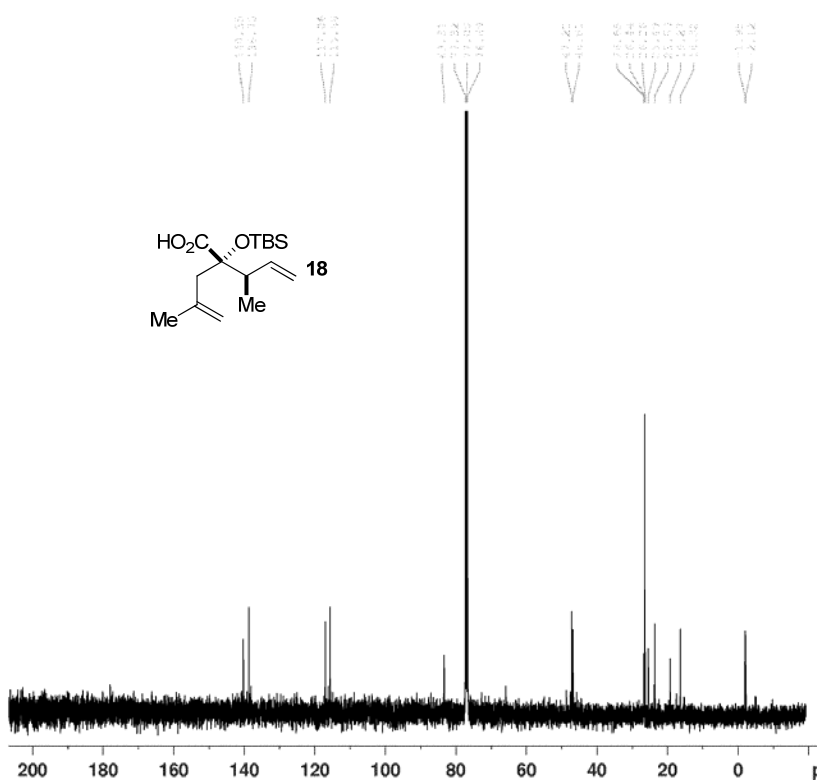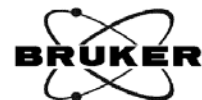

Current Data Parameters  
 NAME DS-IV-287fr5-6  
 EXPNO 1  
 PROCNO 1

F2 - Acquisition Parameters  
 Date\_ 20091101  
 Time 15.13  
 INSTRUM spect  
 PROBHD 5 mm QNP 1H/1  
 PULPROG zgpg30  
 TD 32768  
 SOLVENT CDCl3  
 NS 2916  
 DS 2  
 SWH 23980.814 Hz  
 FIDRES 0.731836 Hz  
 AQ 0.6832628 sec  
 RG 16384  
 DW 20.850 usec  
 DE 6.00 usec  
 TE 300.0 K  
 D1 1.80000000 sec  
 d11 0.03000000 sec  
 DELTA 0.89999998 sec  
 TDO 1

----- CHANNEL f1 -----  
 NUC1 13C  
 P1 7.25 usec  
 PL1 0.00 dB  
 SFO1 100.5499020 MHz

----- CHANNEL f2 -----  
 CDPFRG2 waltz16  
 NUC2 1H  
 PCPD2 90.00 usec  
 PL2 -3.00 dB  
 PL12 16.72 dB  
 PL13 20.00 dB  
 SFO2 399.8415994 MHz

F2 - Processing parameters  
 SI 32768  
 SF 100.5398435 MHz  
 WDW EM  
 SSB 0  
 LB 1.00 Hz  
 GB 0  
 PC 1.40

DS-IV-284fr9-17

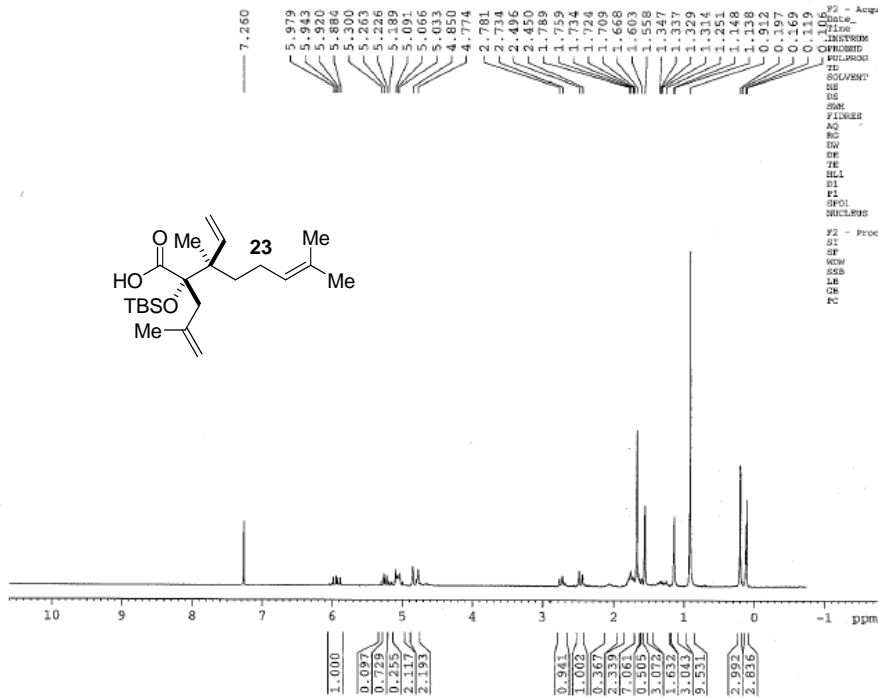

Current Data Parameters  
NAME DS-IV-284fr9-17  
EXPNO 1  
PROCNO 1

F2 - Acquisition Parameters  
Date\_ 20091016  
Time 8.53  
INSTRUM spect  
PROBHD 5 mm TMO 13C/1  
PULPROG zgpg30  
TD 32768  
SOLVENT CDCl3  
NS 8  
DS 2  
SWH 4237.268 Hz  
FIDRES 0.129312 Hz  
AQ 3.8666733 sec  
RG 3048  
RW 118.000 usec  
DE 148.97 usec  
TE 193.0 K  
HLL 4 dB  
d1 1.0000000 sec  
d11 11.25 usec  
SFO1 300.1319003 MHz  
NUC1 13C

F2 - Processing parameters  
SI 16384  
SF 300.1309001 MHz  
WDW EM  
SSB 0  
LB 0.30 Hz  
GB 0  
PC 1.00

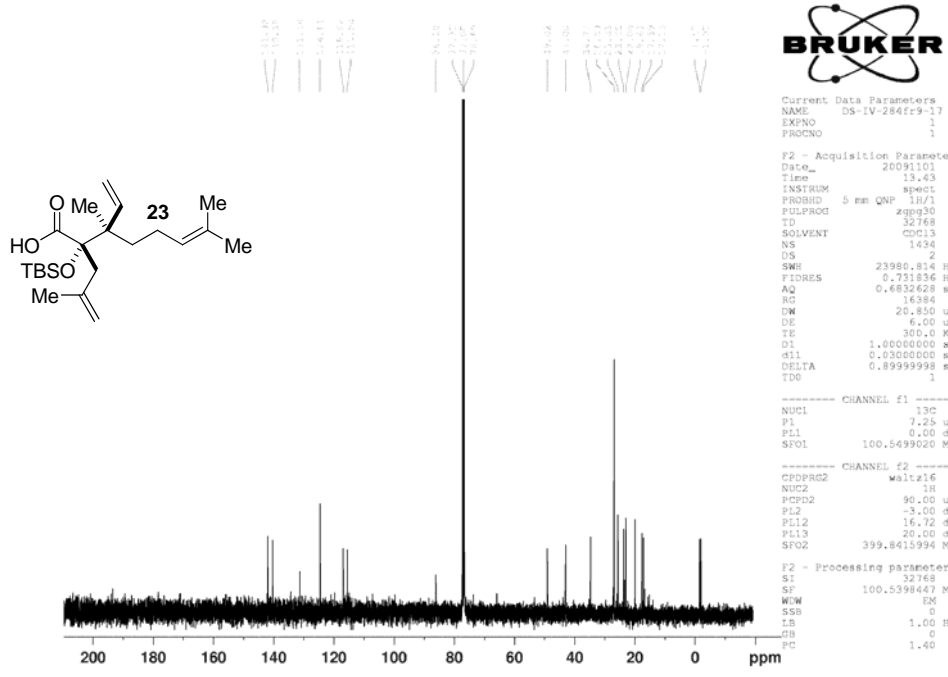

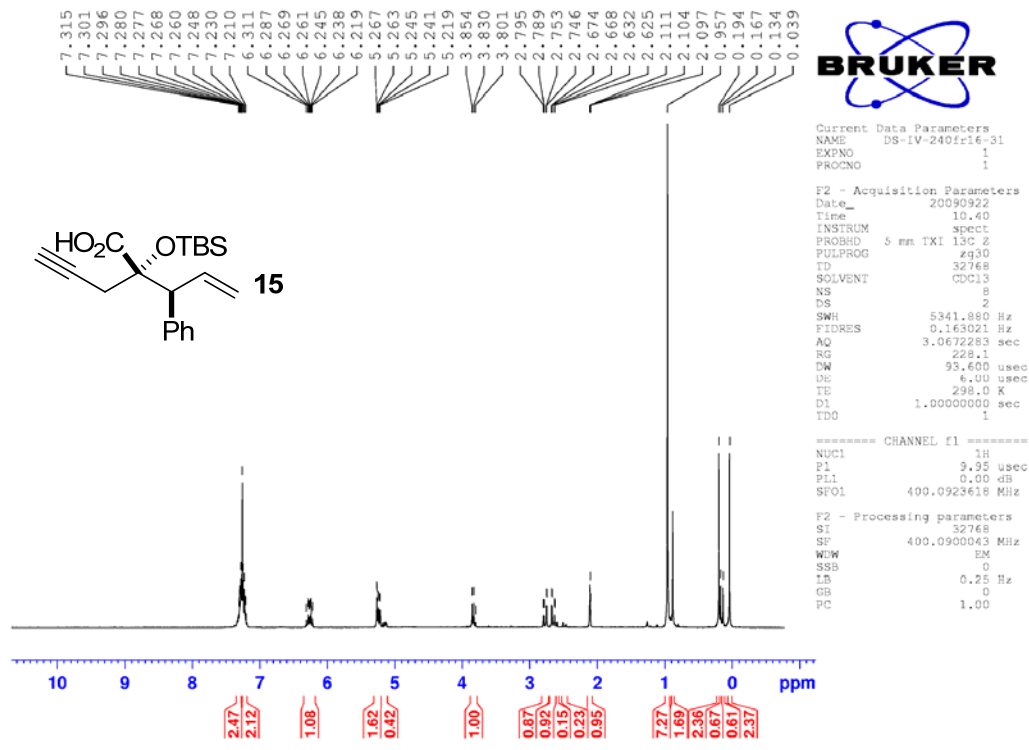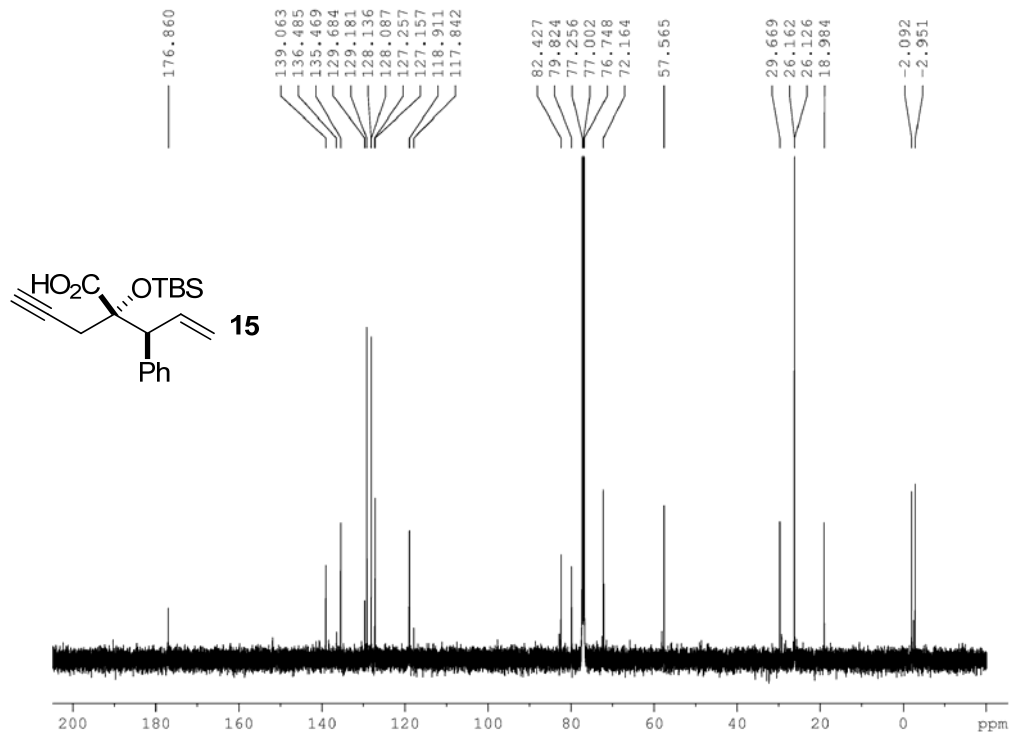







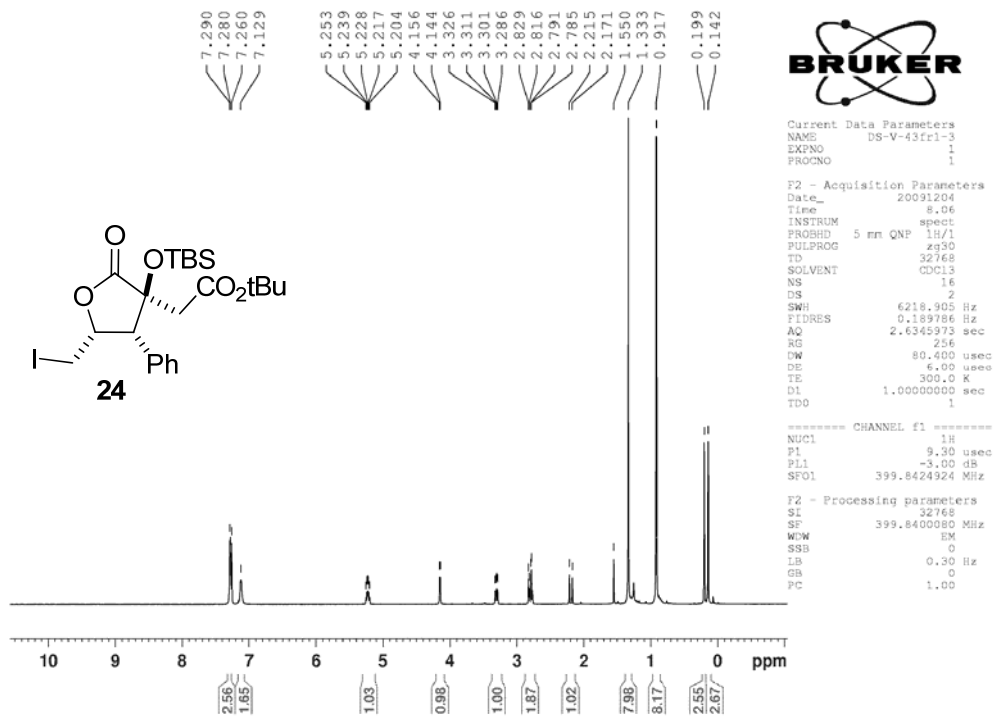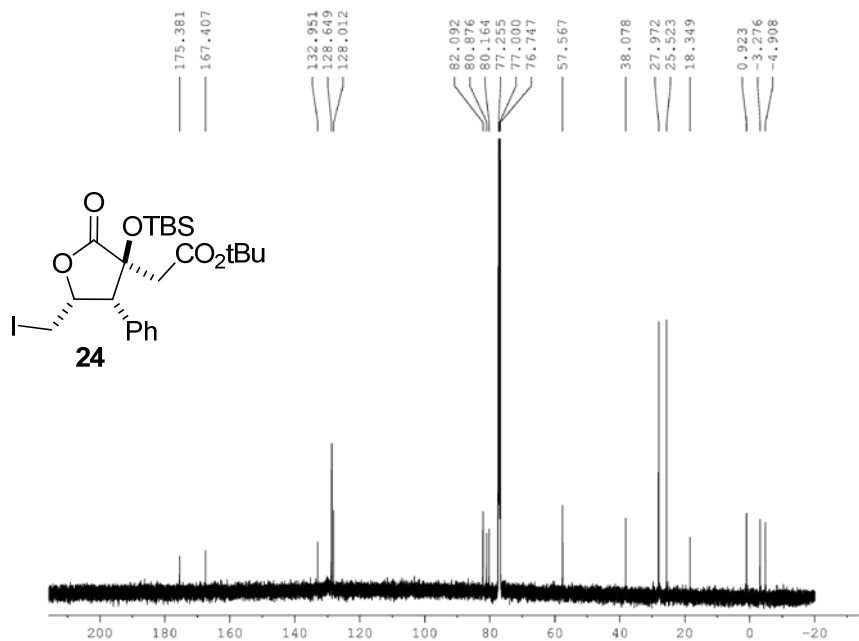

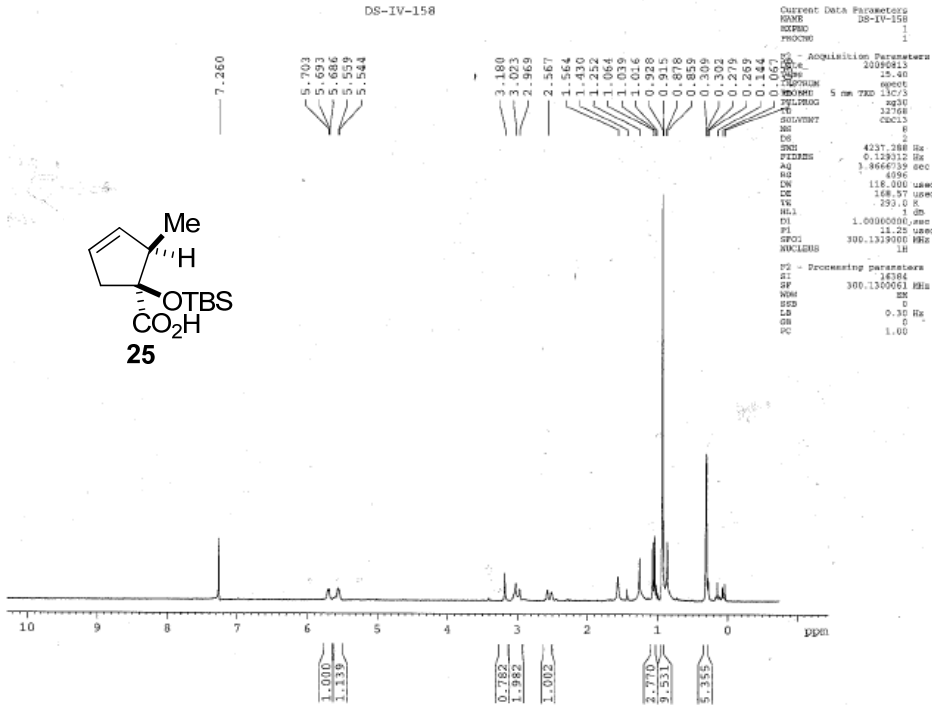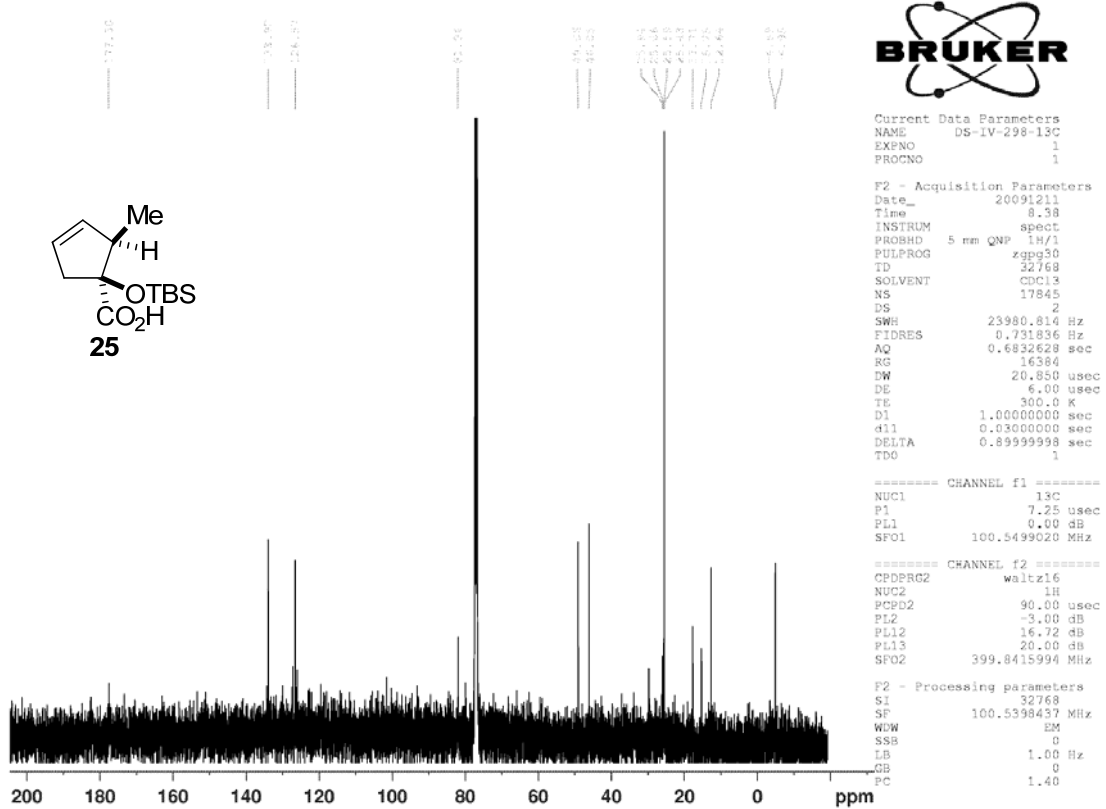

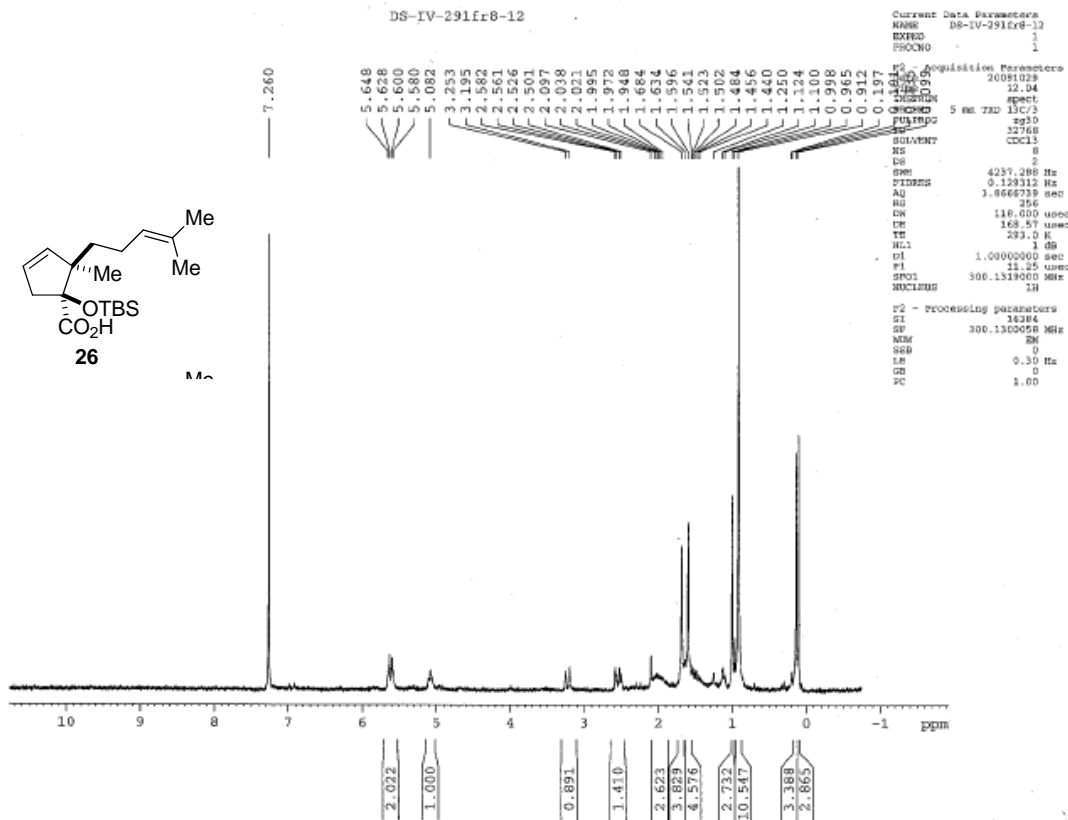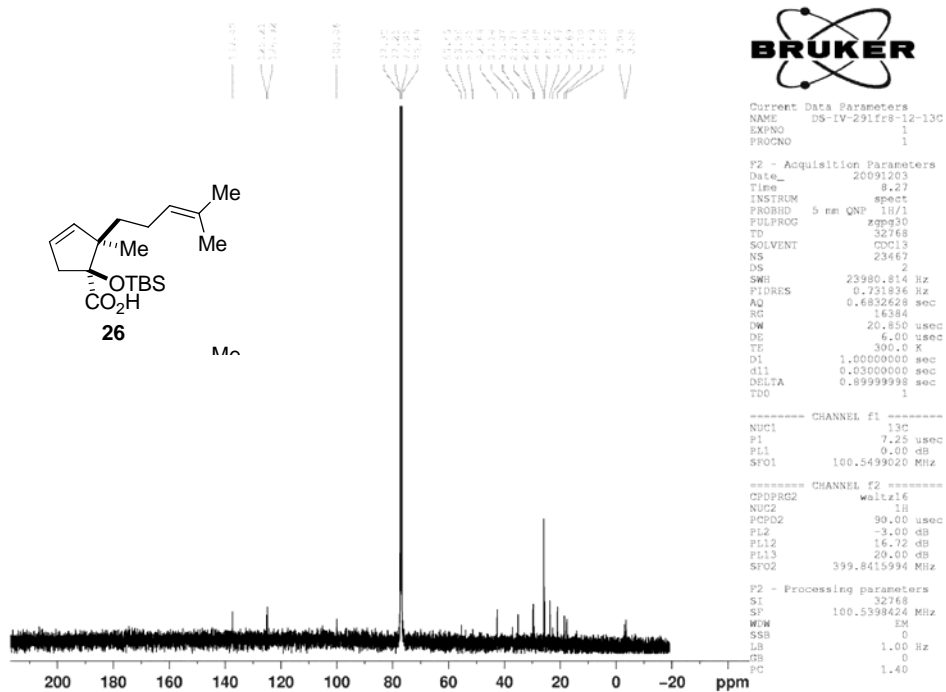

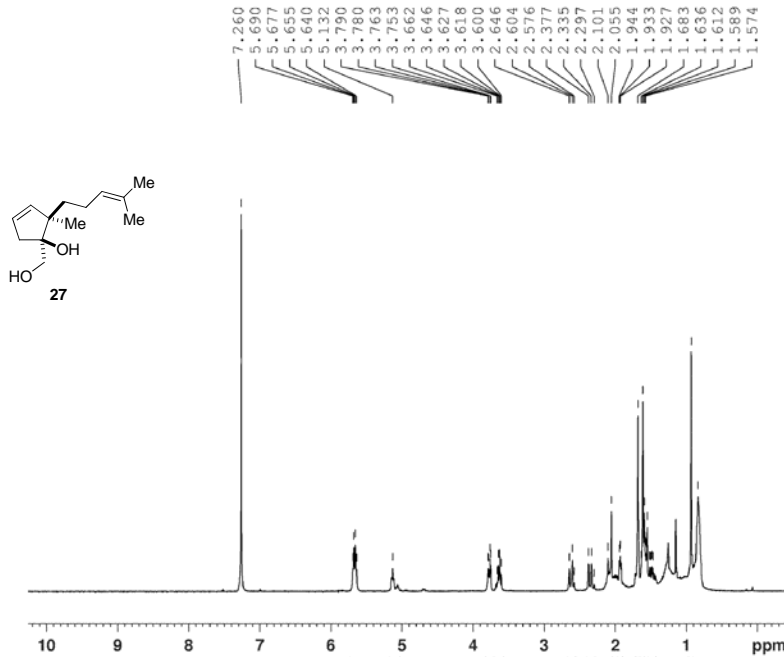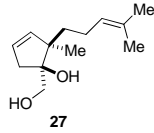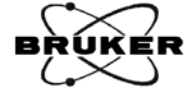

Current Data Parameters  
 NAME DS-IV-293p  
 EXPNO 1  
 PROCNO 1

F2 - Acquisition Parameters  
 Date\_ 20091211  
 Time 12.54  
 INSTRUM spect  
 PROBHD 5 mm TXI 13C Z  
 PULPROG zg30  
 ID 32768  
 SOLVENT CDCl3  
 NS 16  
 DS 2  
 SWH 5341.860 Hz  
 FIDRES 0.163021 Hz  
 AQ 3.0672283 sec  
 RG 362  
 DM 93.600 usec  
 DE 6.00 usec  
 TE 294.5 K  
 D1 1.0000000 sec  
 TDO 1

----- CHANNEL f1 -----  
 NUC1 1H  
 P1 9.95 usec  
 PL1 0.00 dB  
 SFO1 400.0923618 MHz

F2 - Processing parameters  
 SI 32768  
 SF 400.0900033 MHz  
 WDW EM  
 SSB 0  
 LB 0.25 Hz  
 GB 0  
 PC 1.00

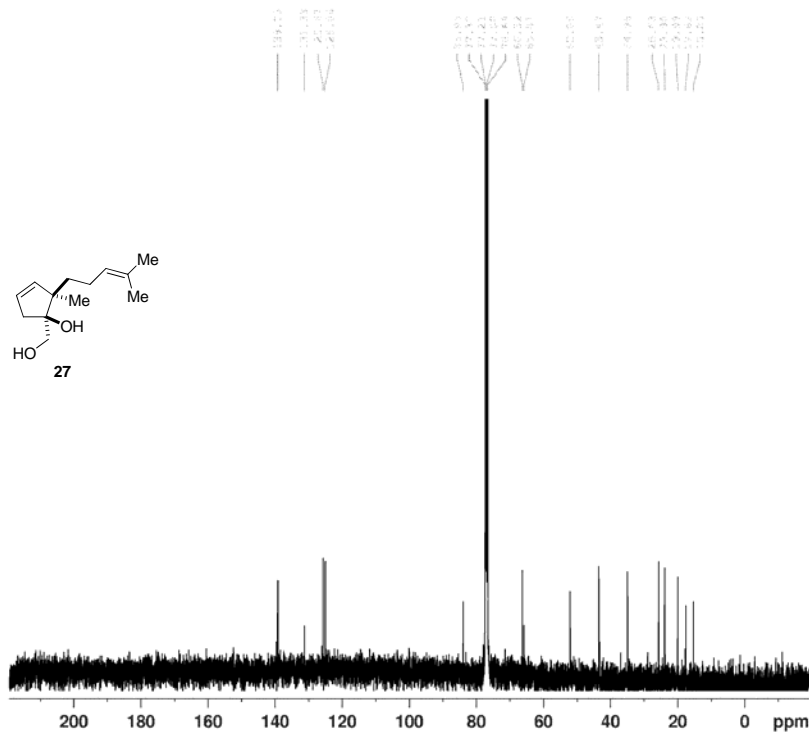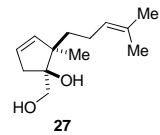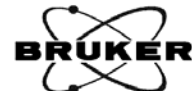

Current Data Parameters  
 NAME DS-IV-293-13C  
 EXPNO 1  
 PROCNO 1

F2 - Acquisition Parameters  
 Date\_ 20091207  
 Time 8.55  
 INSTRUM spect  
 PROBHD 5 mm QNP 1H/1  
 PULPROG zgpg30  
 TD 32768  
 SOLVENT CDCl3  
 NS 26609  
 DS 2  
 SWH 23980.814 Hz  
 FIDRES 0.731836 Hz  
 AQ 0.6832628 sec  
 RG 16384  
 DW 20.850 usec  
 DE 6.00 usec  
 TE 300.0 K  
 D1 1.0000000 sec  
 d11 0.0300000 sec  
 DELTA 0.89999998 sec  
 TDO 1

----- CHANNEL f1 -----  
 NUC1 13C  
 P1 7.25 usec  
 PL1 0.00 dB  
 SFO1 100.5499620 MHz

----- CHANNEL f2 -----  
 CPDPRG2 waltz16  
 NUC2 1H  
 PCPD2 90.00 usec  
 PL2 -3.00 dB  
 PL12 16.72 dB  
 PL13 20.00 dB  
 SFO2 399.8415994 MHz

F2 - Processing parameters  
 SI 32768  
 SF 100.5398425 MHz  
 WDW EM  
 SSB 0  
 LB 1.00 Hz  
 GB 0  
 PC 1.40

## VII. 2D NOESY for Cyclized Products

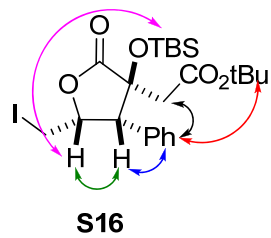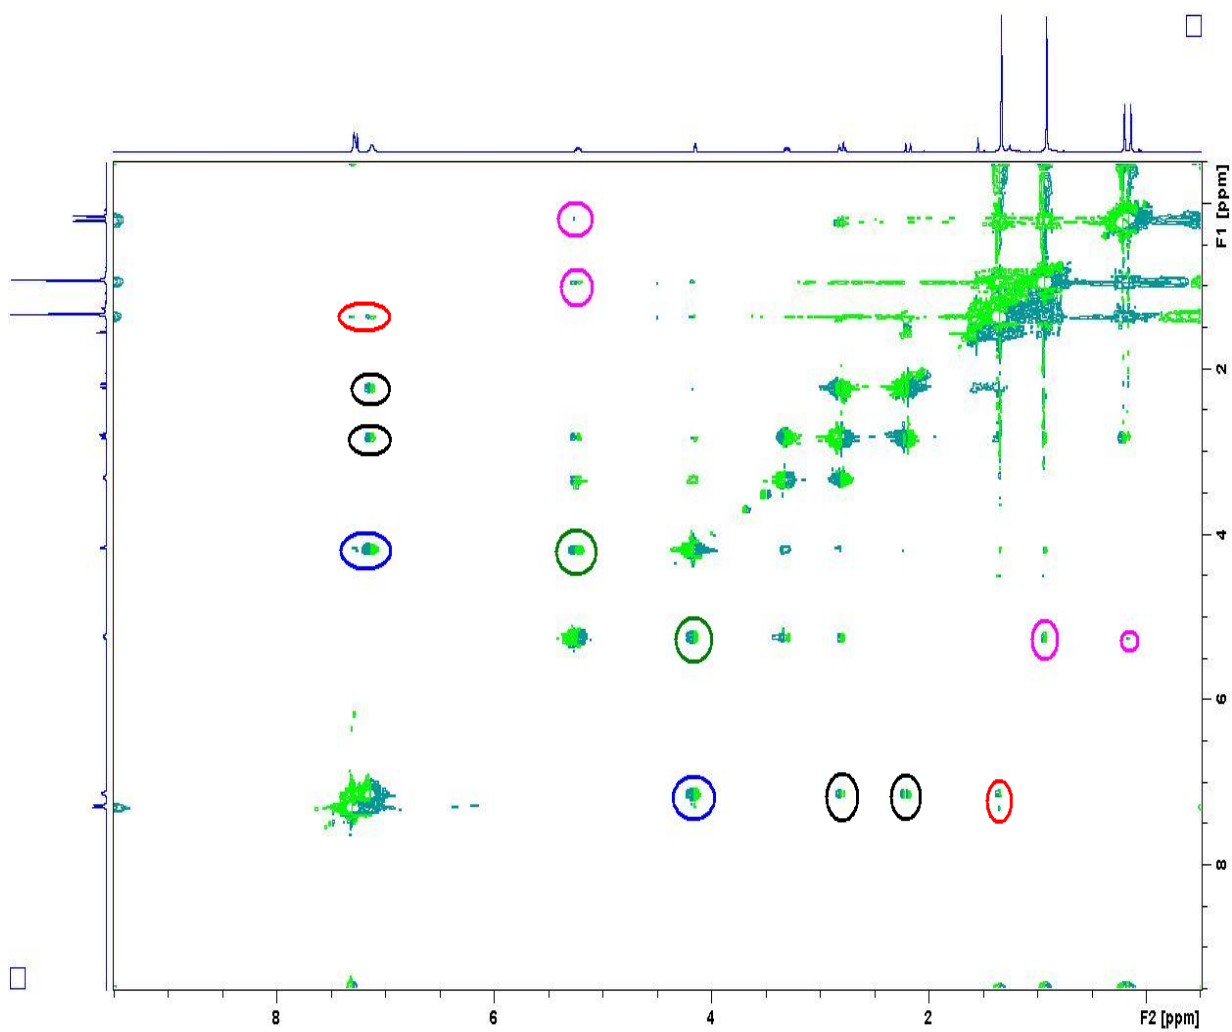

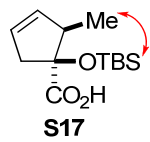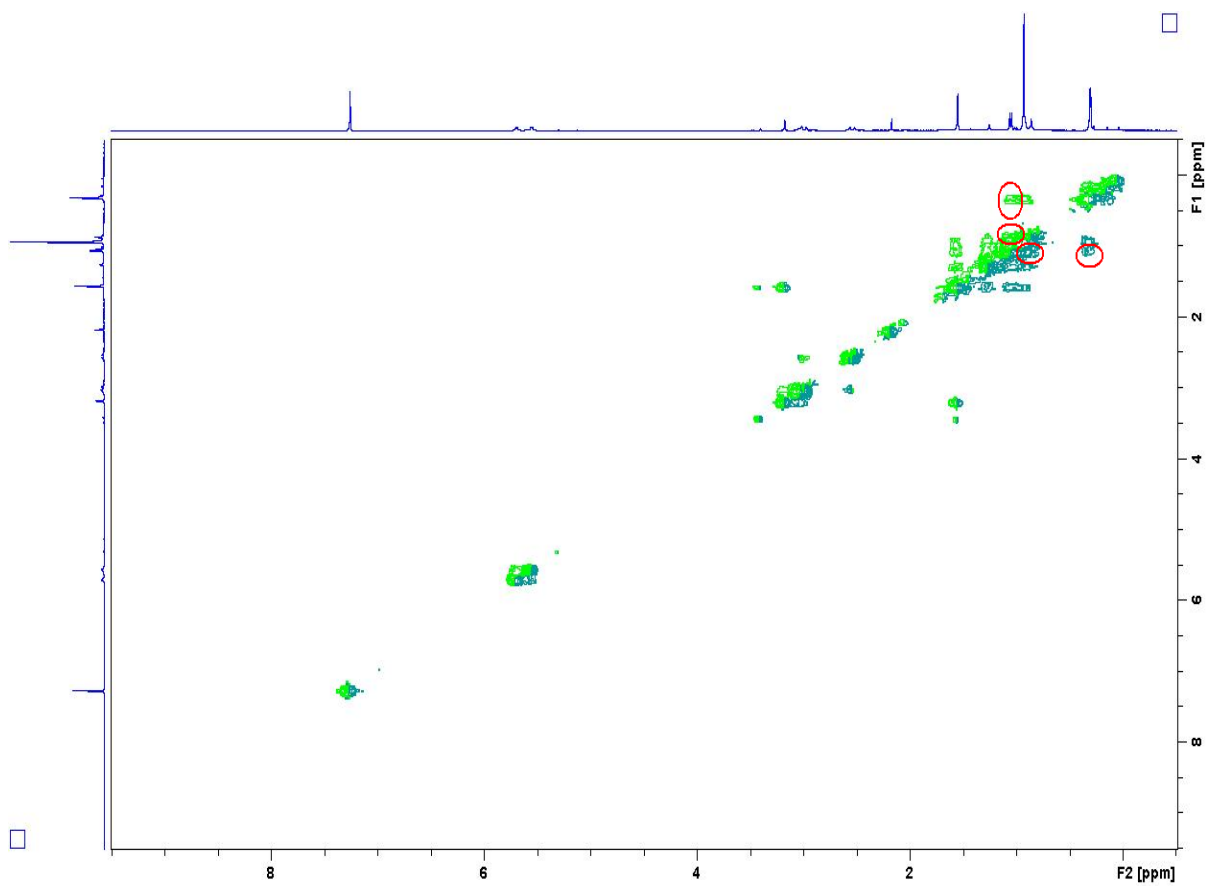

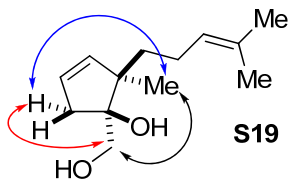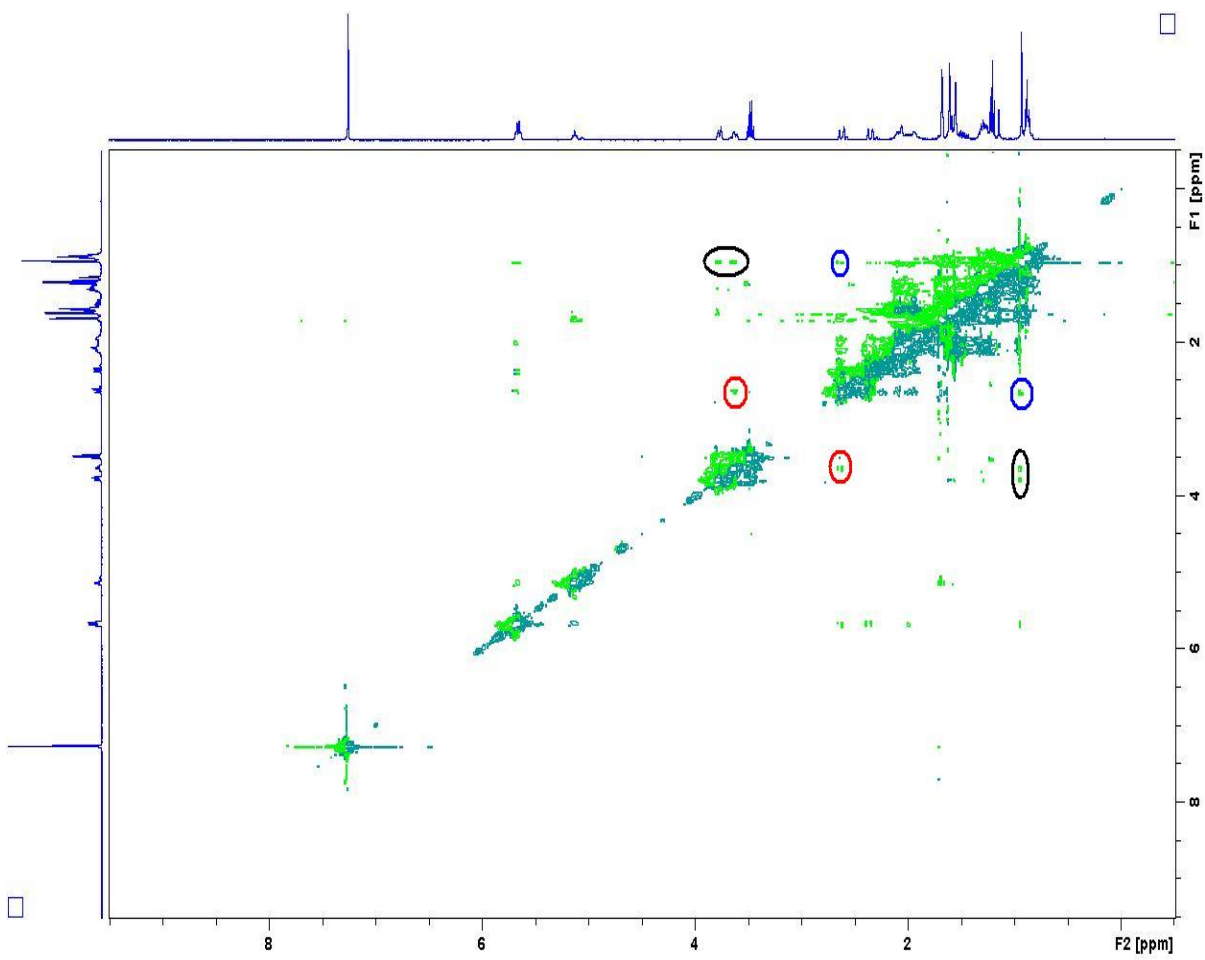

Supplement: NIHMS178266-supplement-1_si_001.pdf [file NIHMS178266-supplement-1_si_001.pdf]
